# Supplementary material
Source: publisher figshare collection journal article supplement (https://acs.figshare.com/ndownloader/files/7439581)
Supplement: Supplementary file 1 [file 7439581]

#-----------------------------------------------------------------------------80
#     Subsequently are contained the CIF's of four structures
#     1 = compound (2)
#     2 = compound (3)
#     3 = compound (6)
#     4 = compound (7)
#     separated by #===END
#-----------------------------------------------------------------------------80

#Publication details

loop_
_publ_author_name
                     'Esteruelas, M. A.'
                     'L\'opez,A. M.'
                     'O\~nate, E.'
                     'San-Torcuateo, A.'
                     'Tsai, J.-Y.'
                     'Xia, C.'
                    
 _publ_requested_journal		'Organometallics'
 _journal_name_full
; 
  Organometallics  
;
_publ_section_title
;
Formation of Dinuclear-Iridium Complexes by NHC-Supported C-H Bond Activation
;
_publ_contact_letter              
;
november ##, 2016
Please consider this CIF submission as supplementary material of
the structures contained in the paper: 

Formation of Dinuclear-Iridium Complexes by NHC-Supported C-H Bond Activation

that is submitted to Organometallics for publication. 
;
_journal_volume      ?
_journal_page_first  ?
_journal_page_last   ?
_journal_year        ?
                     


# ---------------------------------------------------------------------
# Data for compound 2 
    
 
 
data_2-enriquen102 
 
_audit_creation_method            SHELXL-97 
_chemical_name_systematic 
; 
 ? 
; 
_chemical_name_common             ? 
_chemical_melting_point           ? 
_chemical_formula_moiety          
 '2(C50 H100 Ir2 N4 P4), C7 H8' 
_chemical_formula_sum 
 'C53.50 H104 Ir2 N4 P4' 
_chemical_formula_weight          1311.69 
 
loop_ 
 _atom_type_symbol 
 _atom_type_description 
 _atom_type_scat_dispersion_real 
 _atom_type_scat_dispersion_imag 
 _atom_type_scat_source 
 'C'  'C'   0.0033   0.0016 
 'International Tables Vol C Tables 4.2.6.8 and 6.1.1.4' 
 'H'  'H'   0.0000   0.0000 
 'International Tables Vol C Tables 4.2.6.8 and 6.1.1.4' 
 'N'  'N'   0.0061   0.0033 
 'International Tables Vol C Tables 4.2.6.8 and 6.1.1.4' 
 'P'  'P'   0.1023   0.0942 
 'International Tables Vol C Tables 4.2.6.8 and 6.1.1.4' 
 'Ir'  'Ir'  -1.4442   7.9887 
 'International Tables Vol C Tables 4.2.6.8 and 6.1.1.4' 
 
_symmetry_cell_setting            'triclinic' 
_symmetry_space_group_name_H-M    'P-1' 
 
loop_ 
 _symmetry_equiv_pos_as_xyz 
 'x, y, z' 
 '-x, -y, -z' 
 
_cell_length_a                    12.671(2) 
_cell_length_b                    13.823(2) 
_cell_length_c                    19.540(5) 
_cell_angle_alpha                 107.101(3) 
_cell_angle_beta                  94.717(3) 
_cell_angle_gamma                 113.622(2) 
_cell_volume                      2917.8(10) 
_cell_formula_units_Z             2 
_cell_measurement_temperature     150(2) 
_cell_measurement_reflns_used     7761 
_cell_measurement_theta_min       2 
_cell_measurement_theta_max       27 
 
_exptl_crystal_description        'irregular block' 
_exptl_crystal_colour             'colourless'
_exptl_crystal_size_max           0.18 
_exptl_crystal_size_mid           0.05 
_exptl_crystal_size_min           0.05 
_exptl_crystal_density_meas       ? 
_exptl_crystal_density_diffrn     1.493 
_exptl_crystal_density_method     'not measured' 
_exptl_crystal_F_000              1334 
_exptl_absorpt_coefficient_mu     4.702 
_exptl_absorpt_correction_type    'multi-scan' 
_exptl_absorpt_correction_T_min   0.659 
_exptl_absorpt_correction_T_max   0.862 
_exptl_absorpt_process_details    
;
Absorption correction performed with SADABS program. This is based on the
method of Blessing: Blessing, R. H., Acta Crystallogr., Sect. A 1995, 51, 33.

SADABS: Area-Detector Absorption Correction. Bruker-AXS 
within SAINT+ package, v. 6.1 (2000).
;
 
_diffrn_ambient_temperature       150(2) 
_diffrn_radiation_wavelength      0.71073 
_diffrn_radiation_type            MoK\a 
_diffrn_radiation_source          'fine-focus sealed tube' 
_diffrn_radiation_monochromator   graphite 
_diffrn_measurement_device_type   'Bruker APEX DUO system' 
_diffrn_measurement_method        '\w rotations with narrow frames' 
_diffrn_detector_area_resol_mean  8.33 
_diffrn_standards_decay_%         0 
_diffrn_reflns_number             32370 
_diffrn_reflns_av_R_equivalents   0.0435 
_diffrn_reflns_av_sigmaI/netI     0.0656 
_diffrn_reflns_limit_h_min        -17 
_diffrn_reflns_limit_h_max        16 
_diffrn_reflns_limit_k_min        -19 
_diffrn_reflns_limit_k_max        18 
_diffrn_reflns_limit_l_min        -26 
_diffrn_reflns_limit_l_max        26 
_diffrn_reflns_theta_min          1.68 
_diffrn_reflns_theta_max          29.62 
_reflns_number_total              14710 
_reflns_number_gt                 10789 
_reflns_threshold_expression      >2sigma(I) 
 
_computing_data_collection        'apex2 v. 7.0 (Bruker AXS, 2009)' 
_computing_cell_refinement        'SAINT+ v. 7.56a (Bruker AXS, 2008)' 
_computing_data_reduction         'SAINT+ v. 7.56a (Bruker AXS, 2008)' 
_computing_structure_solution     'SHELXS-97 (Sheldrick, 1990)' 
_computing_structure_refinement   'SHELXL-97 (Sheldrick, 1997)' 
_computing_molecular_graphics     'XP, SHELXTL v. 6.14 (Bruker, 2000)' 
_computing_publication_material   'XCIF, SHELXTL v. 6.14 (Bruker, 2000)'
 
_refine_special_details 
; 
 Refinement of F^2^ against ALL reflections.  The weighted R-factor wR and 
 goodness of fit S are based on F^2^, conventional R-factors R are based 
 on F, with F set to zero for negative F^2^. The threshold expression of 
 F^2^ > 2sigma(F^2^) is used only for calculating R-factors(gt) etc. and is 
 not relevant to the choice of reflections for refinement.  R-factors based 
 on F^2^ are statistically about twice as large as those based on F, and R- 
 factors based on ALL data will be even larger. 
; 
 
_refine_ls_structure_factor_coef  Fsqd  
_refine_ls_matrix_type            full 
_refine_ls_weighting_scheme       calc  
_refine_ls_weighting_details 
 'calc w=1/[\s^2^(Fo^2^)+(0.0282P)^2^+0.0000P] where P=(Fo^2^+2Fc^2^)/3' 
_atom_sites_solution_primary      direct 
_atom_sites_solution_secondary    difmap 
_atom_sites_solution_hydrogens    geom 
_refine_ls_hydrogen_treatment     mixed 
_refine_ls_extinction_method      none 
_refine_ls_extinction_coef        ? 
_refine_ls_number_reflns          14710 
_refine_ls_number_parameters      589 
_refine_ls_number_restraints      7 
_refine_ls_R_factor_all           0.0571 
_refine_ls_R_factor_gt            0.0366 
_refine_ls_wR_factor_ref          0.0804 
_refine_ls_wR_factor_gt           0.0725 
_refine_ls_goodness_of_fit_ref    0.980 
_refine_ls_restrained_S_all       0.984 
_refine_ls_shift/su_max           0.004 
_refine_ls_shift/su_mean          0.000 
 
loop_ 
 _atom_site_label 
 _atom_site_type_symbol 
 _atom_site_fract_x 
 _atom_site_fract_y 
 _atom_site_fract_z 
 _atom_site_U_iso_or_equiv 
 _atom_site_adp_type 
 _atom_site_occupancy 
 _atom_site_symmetry_multiplicity 
 _atom_site_calc_flag 
 _atom_site_refinement_flags 
 _atom_site_disorder_assembly 
 _atom_site_disorder_group 
Ir1 Ir -0.182480(14) 0.736033(14) 0.145550(9) 0.02182(5) Uani 1 1 d D . . 
H01 H -0.198(3) 0.741(3) 0.2263(10) 0.026 Uiso 1 1 d D . . 
H02 H -0.298(2) 0.6178(17) 0.116(2) 0.026 Uiso 1 1 d D . . 
Ir2 Ir 0.218964(15) 1.228190(14) 0.370591(10) 0.02569(5) Uani 1 1 d D . . 
H03 H 0.296(3) 1.333(2) 0.4437(13) 0.031 Uiso 1 1 d D . . 
H04 H 0.133(3) 1.175(3) 0.4181(19) 0.031 Uiso 1 1 d D . . 
P1 P -0.31778(10) 0.80788(10) 0.15218(7) 0.0263(3) Uani 1 1 d . . . 
P2 P -0.08006(10) 0.63843(10) 0.16622(7) 0.0244(2) Uani 1 1 d . . . 
P3 P 0.11588(11) 1.33280(10) 0.37140(7) 0.0286(3) Uani 1 1 d . . . 
P4 P 0.30988(11) 1.13919(10) 0.41745(7) 0.0307(3) Uani 1 1 d . . . 
N1 N -0.1711(3) 0.6874(3) -0.0252(2) 0.0314(9) Uani 1 1 d . . . 
N2 N -0.0385(3) 0.8441(3) 0.05451(19) 0.0235(8) Uani 1 1 d . . . 
N3 N 0.2740(3) 1.2054(3) 0.2257(2) 0.0274(8) Uani 1 1 d . . . 
N4 N 0.4174(3) 1.3632(3) 0.2960(2) 0.0377(10) Uani 1 1 d . . . 
C1 C -0.1355(4) 0.7469(4) 0.0488(2) 0.0253(9) Uani 1 1 d . . . 
C2 C -0.2695(4) 0.5739(4) -0.0601(3) 0.0437(13) Uani 1 1 d . . . 
H2A H -0.2384 0.5194 -0.0793 0.066 Uiso 1 1 calc R . . 
H2B H -0.3214 0.5728 -0.1007 0.066 Uiso 1 1 calc R . . 
H2C H -0.3144 0.5537 -0.0239 0.066 Uiso 1 1 calc R . . 
C3 C -0.1009(4) 0.7466(4) -0.0634(3) 0.0371(12) Uani 1 1 d . . . 
H3 H -0.1096 0.7227 -0.1153 0.044 Uiso 1 1 calc R . . 
C4 C -0.0179(4) 0.8445(4) -0.0133(2) 0.0312(10) Uani 1 1 d . . . 
H4 H 0.0433 0.9030 -0.0230 0.037 Uiso 1 1 calc R . . 
C5 C 0.0186(4) 0.9270(3) 0.1262(2) 0.0222(9) Uani 1 1 d . . . 
C6 C -0.0324(3) 0.8981(3) 0.1829(2) 0.0222(9) Uani 1 1 d . . . 
C7 C 0.0233(3) 0.9830(3) 0.2542(2) 0.0203(8) Uani 1 1 d . . . 
H7 H -0.0095 0.9680 0.2941 0.024 Uiso 1 1 calc R . . 
C8 C 0.1237(4) 1.0880(4) 0.2705(2) 0.0249(9) Uani 1 1 d . . . 
C9 C 0.1688(4) 1.1023(3) 0.2088(2) 0.0244(9) Uani 1 1 d . . . 
C10 C 0.1196(4) 1.0254(3) 0.1372(2) 0.0245(9) Uani 1 1 d . . . 
H10 H 0.1537 1.0395 0.0976 0.029 Uiso 1 1 calc R . . 
C11 C 0.3179(4) 1.2764(4) 0.2979(3) 0.0286(10) Uani 1 1 d . . . 
C12 C 0.3442(4) 1.2485(4) 0.1811(3) 0.0371(12) Uani 1 1 d . . . 
H12 H 0.3314 1.2148 0.1293 0.044 Uiso 1 1 calc R . . 
C13 C 0.4335(4) 1.3468(4) 0.2251(3) 0.0437(13) Uani 1 1 d . . . 
H13 H 0.4965 1.3962 0.2104 0.052 Uiso 1 1 calc R . . 
C14 C 0.4943(4) 1.4613(4) 0.3608(3) 0.0511(15) Uani 1 1 d . . . 
H14A H 0.4883 1.5284 0.3575 0.077 Uiso 1 1 calc R . . 
H14B H 0.5763 1.4729 0.3634 0.077 Uiso 1 1 calc R . . 
H14C H 0.4701 1.4487 0.4050 0.077 Uiso 1 1 calc R . . 
C15 C -0.2665(4) 0.9451(4) 0.2295(3) 0.0328(11) Uani 1 1 d . . . 
H15 H -0.1836 0.9916 0.2275 0.039 Uiso 1 1 calc R . . 
C16 C -0.2563(5) 0.9330(4) 0.3052(3) 0.0454(13) Uani 1 1 d . . . 
H16A H -0.2044 1.0070 0.3430 0.068 Uiso 1 1 calc R . . 
H16B H -0.2230 0.8800 0.3049 0.068 Uiso 1 1 calc R . . 
H16C H -0.3349 0.9044 0.3159 0.068 Uiso 1 1 calc R . . 
C17 C -0.3307(4) 1.0176(4) 0.2271(3) 0.0503(15) Uani 1 1 d . . . 
H17A H -0.4134 0.9767 0.2289 0.076 Uiso 1 1 calc R . . 
H17B H -0.3279 1.0336 0.1814 0.076 Uiso 1 1 calc R . . 
H17C H -0.2920 1.0889 0.2693 0.076 Uiso 1 1 calc R . . 
C18 C -0.4643(4) 0.7067(4) 0.1588(3) 0.0317(11) Uani 1 1 d . . . 
H18 H -0.4942 0.6408 0.1114 0.038 Uiso 1 1 calc R . . 
C19 C -0.4596(4) 0.6570(5) 0.2190(3) 0.0469(14) Uani 1 1 d . . . 
H19A H -0.4369 0.7163 0.2675 0.070 Uiso 1 1 calc R . . 
H19B H -0.4011 0.6271 0.2149 0.070 Uiso 1 1 calc R . . 
H19C H -0.5376 0.5958 0.2132 0.070 Uiso 1 1 calc R . . 
C20 C -0.5619(4) 0.7464(5) 0.1631(3) 0.0497(15) Uani 1 1 d . . . 
H20A H -0.6370 0.6834 0.1599 0.074 Uiso 1 1 calc R . . 
H20B H -0.5705 0.7724 0.1224 0.074 Uiso 1 1 calc R . . 
H20C H -0.5405 0.8086 0.2100 0.074 Uiso 1 1 calc R . . 
C21 C -0.3633(4) 0.8413(4) 0.0724(3) 0.0365(12) Uani 1 1 d . . . 
H21 H -0.4168 0.8771 0.0863 0.044 Uiso 1 1 calc R . . 
C22 C -0.2563(5) 0.9280(5) 0.0561(3) 0.0470(14) Uani 1 1 d . . . 
H22A H -0.2085 0.8917 0.0344 0.070 Uiso 1 1 calc R . . 
H22B H -0.2082 0.9910 0.1020 0.070 Uiso 1 1 calc R . . 
H22C H -0.2842 0.9564 0.0217 0.070 Uiso 1 1 calc R . . 
C23 C -0.4333(5) 0.7356(5) 0.0029(3) 0.0481(14) Uani 1 1 d . . . 
H23A H -0.4534 0.7582 -0.0375 0.072 Uiso 1 1 calc R . . 
H23B H -0.5061 0.6856 0.0126 0.072 Uiso 1 1 calc R . . 
H23C H -0.3850 0.6956 -0.0107 0.072 Uiso 1 1 calc R . . 
C24 C -0.1063(4) 0.5913(4) 0.2453(3) 0.0344(11) Uani 1 1 d . . . 
H24 H -0.0555 0.5528 0.2500 0.041 Uiso 1 1 calc R . . 
C25 C -0.0684(5) 0.6916(5) 0.3165(3) 0.0450(13) Uani 1 1 d . . . 
H25A H -0.1260 0.7223 0.3179 0.067 Uiso 1 1 calc R . . 
H25B H 0.0096 0.7501 0.3191 0.067 Uiso 1 1 calc R . . 
H25C H -0.0642 0.6670 0.3584 0.067 Uiso 1 1 calc R . . 
C26 C -0.2340(5) 0.5072(5) 0.2369(4) 0.0560(16) Uani 1 1 d . . . 
H26A H -0.2433 0.4942 0.2832 0.084 Uiso 1 1 calc R . . 
H26B H -0.2531 0.4355 0.1976 0.084 Uiso 1 1 calc R . . 
H26C H -0.2875 0.5378 0.2245 0.084 Uiso 1 1 calc R . . 
C27 C -0.1056(4) 0.5088(4) 0.0880(3) 0.0370(12) Uani 1 1 d . . . 
H27 H -0.0770 0.5361 0.0478 0.044 Uiso 1 1 calc R . . 
C28 C -0.2372(5) 0.4241(4) 0.0551(3) 0.0534(15) Uani 1 1 d . . . 
H28A H -0.2469 0.3774 0.0042 0.080 Uiso 1 1 calc R . . 
H28B H -0.2846 0.4655 0.0562 0.080 Uiso 1 1 calc R . . 
H28C H -0.2636 0.3755 0.0842 0.080 Uiso 1 1 calc R . . 
C29 C -0.0367(5) 0.4440(5) 0.1009(3) 0.0579(17) Uani 1 1 d . . . 
H29A H -0.0526 0.4238 0.1444 0.087 Uiso 1 1 calc R . . 
H29B H 0.0482 0.4917 0.1089 0.087 Uiso 1 1 calc R . . 
H29C H -0.0616 0.3750 0.0579 0.087 Uiso 1 1 calc R . . 
C30 C 0.0844(4) 0.7245(4) 0.1913(3) 0.0296(10) Uani 1 1 d . . . 
H30 H 0.0984 0.8023 0.2222 0.036 Uiso 1 1 calc R . . 
C31 C 0.1329(4) 0.7377(5) 0.1240(3) 0.0469(14) Uani 1 1 d . . . 
H31A H 0.2140 0.7986 0.1399 0.070 Uiso 1 1 calc R . . 
H31B H 0.0831 0.7564 0.0943 0.070 Uiso 1 1 calc R . . 
H31C H 0.1328 0.6668 0.0945 0.070 Uiso 1 1 calc R . . 
C32 C 0.1623(4) 0.6943(4) 0.2376(3) 0.0429(13) Uani 1 1 d . . . 
H32A H 0.1577 0.6208 0.2090 0.064 Uiso 1 1 calc R . . 
H32B H 0.1342 0.6903 0.2824 0.064 Uiso 1 1 calc R . . 
H32C H 0.2445 0.7524 0.2509 0.064 Uiso 1 1 calc R . . 
C33 C -0.0301(4) 1.2653(4) 0.3040(3) 0.0350(11) Uani 1 1 d . . . 
H33 H -0.0773 1.1931 0.3117 0.042 Uiso 1 1 calc R . . 
C34 C -0.1064(5) 1.3286(5) 0.3143(3) 0.0509(15) Uani 1 1 d . . . 
H34A H -0.0663 1.3998 0.3060 0.076 Uiso 1 1 calc R . . 
H34B H -0.1188 1.3448 0.3645 0.076 Uiso 1 1 calc R . . 
H34C H -0.1831 1.2817 0.2791 0.076 Uiso 1 1 calc R . . 
C35 C -0.0221(5) 1.2294(4) 0.2234(3) 0.0425(13) Uani 1 1 d . . . 
H35A H -0.1002 1.1729 0.1924 0.064 Uiso 1 1 calc R . . 
H35B H 0.0341 1.1969 0.2176 0.064 Uiso 1 1 calc R . . 
H35C H 0.0051 1.2956 0.2084 0.064 Uiso 1 1 calc R . . 
C36 C 0.0680(5) 1.3734(4) 0.4592(3) 0.0387(12) Uani 1 1 d . . . 
H36 H 0.0312 1.4240 0.4555 0.046 Uiso 1 1 calc R . . 
C37 C 0.1722(6) 1.4405(5) 0.5251(3) 0.0573(16) Uani 1 1 d . . . 
H37A H 0.1448 1.4666 0.5692 0.086 Uiso 1 1 calc R . . 
H37B H 0.2306 1.5059 0.5168 0.086 Uiso 1 1 calc R . . 
H37C H 0.2086 1.3924 0.5319 0.086 Uiso 1 1 calc R . . 
C38 C -0.0269(5) 1.2707(5) 0.4706(3) 0.0527(15) Uani 1 1 d . . . 
H38A H 0.0041 1.2162 0.4708 0.079 Uiso 1 1 calc R . . 
H38B H -0.0975 1.2348 0.4305 0.079 Uiso 1 1 calc R . . 
H38C H -0.0477 1.2958 0.5176 0.079 Uiso 1 1 calc R . . 
C39 C 0.2051(5) 1.4759(4) 0.3665(3) 0.0396(12) Uani 1 1 d . . . 
H39 H 0.2860 1.5031 0.3967 0.048 Uiso 1 1 calc R . . 
C40 C 0.1692(5) 1.5702(4) 0.3992(4) 0.0570(16) Uani 1 1 d . . . 
H40A H 0.2281 1.6414 0.3975 0.085 Uiso 1 1 calc R . . 
H40B H 0.1650 1.5787 0.4504 0.085 Uiso 1 1 calc R . . 
H40C H 0.0916 1.5508 0.3706 0.085 Uiso 1 1 calc R . . 
C41 C 0.2231(5) 1.4702(4) 0.2888(3) 0.0481(14) Uani 1 1 d . . . 
H41A H 0.1523 1.4631 0.2592 0.072 Uiso 1 1 calc R . . 
H41B H 0.2371 1.4045 0.2656 0.072 Uiso 1 1 calc R . . 
H41C H 0.2915 1.5393 0.2920 0.072 Uiso 1 1 calc R . . 
C42 C 0.2072(4) 0.9923(4) 0.4103(3) 0.0395(12) Uani 1 1 d . . . 
H42 H 0.1695 0.9500 0.3567 0.047 Uiso 1 1 calc R . . 
C43 C 0.1046(5) 0.9853(4) 0.4479(3) 0.0480(14) Uani 1 1 d . . . 
H43A H 0.0417 0.9074 0.4286 0.072 Uiso 1 1 calc R . . 
H43B H 0.0736 1.0357 0.4382 0.072 Uiso 1 1 calc R . . 
H43C H 0.1327 1.0084 0.5010 0.072 Uiso 1 1 calc R . . 
C44 C 0.2654(5) 0.9247(5) 0.4326(4) 0.0630(18) Uani 1 1 d . . . 
H44A H 0.2935 0.9547 0.4862 0.095 Uiso 1 1 calc R . . 
H44B H 0.3325 0.9312 0.4095 0.095 Uiso 1 1 calc R . . 
H44C H 0.2076 0.8450 0.4164 0.095 Uiso 1 1 calc R . . 
C45 C 0.4274(5) 1.1136(5) 0.3760(4) 0.0553(16) Uani 1 1 d . . . 
H45 H 0.4555 1.0739 0.4029 0.066 Uiso 1 1 calc R . . 
C46 C 0.5355(5) 1.2278(6) 0.3866(4) 0.077(2) Uani 1 1 d . . . 
H46A H 0.6019 1.2133 0.3729 0.116 Uiso 1 1 calc R . . 
H46B H 0.5588 1.2779 0.4382 0.116 Uiso 1 1 calc R . . 
H46C H 0.5137 1.2639 0.3553 0.116 Uiso 1 1 calc R . . 
C47 C 0.3785(5) 1.0358(6) 0.2951(3) 0.0594(17) Uani 1 1 d . . . 
H47A H 0.3498 1.0723 0.2672 0.089 Uiso 1 1 calc R . . 
H47B H 0.3131 0.9642 0.2912 0.089 Uiso 1 1 calc R . . 
H47C H 0.4413 1.0211 0.2751 0.089 Uiso 1 1 calc R . . 
C48 C 0.3879(5) 1.2212(5) 0.5158(3) 0.0514(15) Uani 1 1 d . . . 
H48 H 0.4372 1.2997 0.5175 0.062 Uiso 1 1 calc R . . 
C49 C 0.3019(5) 1.2334(5) 0.5651(3) 0.0523(15) Uani 1 1 d . . . 
H49A H 0.2576 1.1614 0.5716 0.078 Uiso 1 1 calc R . . 
H49B H 0.2467 1.2541 0.5419 0.078 Uiso 1 1 calc R . . 
H49C H 0.3468 1.2925 0.6131 0.078 Uiso 1 1 calc R . . 
C50 C 0.4751(6) 1.1889(6) 0.5505(4) 0.084(2) Uani 1 1 d . . . 
H50A H 0.5197 1.2469 0.5989 0.126 Uiso 1 1 calc R . . 
H50B H 0.5300 1.1830 0.5188 0.126 Uiso 1 1 calc R . . 
H50C H 0.4316 1.1159 0.5560 0.126 Uiso 1 1 calc R . . 
C51 C 0.4198(11) -0.0062(11) 0.0754(7) 0.0776(15) Uiso 0.50 1 d PD A -1 
H51A H 0.3462 -0.0768 0.0570 0.116 Uiso 0.50 1 calc PR A -1 
H51B H 0.4010 0.0582 0.0895 0.116 Uiso 0.50 1 calc PR A -1 
H51C H 0.4676 -0.0041 0.1183 0.116 Uiso 0.50 1 calc PR A -1 
C52 C 0.4802(9) -0.0004(8) 0.0229(5) 0.0776(15) Uiso 0.50 1 d PGD A -1 
C53 C 0.5871(8) 0.0933(7) 0.0349(5) 0.0776(15) Uiso 0.50 1 d PGD A -1 
H53 H 0.6186 0.1534 0.0813 0.093 Uiso 0.50 1 calc PR A -1 
C54 C 0.6479(7) 0.0993(7) -0.0209(6) 0.0776(15) Uiso 0.50 1 d PG A -1 
H54 H 0.7209 0.1634 -0.0127 0.093 Uiso 0.50 1 calc PR A -1 
C55 C 0.6018(8) 0.0114(9) -0.0888(5) 0.0776(15) Uiso 0.50 1 d PG A -1 
H55 H 0.6433 0.0154 -0.1270 0.093 Uiso 0.50 1 calc PR A -1 
C56 C 0.4949(8) -0.0824(7) -0.1008(5) 0.0776(15) Uiso 0.50 1 d PG A -1 
H56 H 0.4634 -0.1425 -0.1472 0.093 Uiso 0.50 1 calc PR A -1 
C57 C 0.4341(7) -0.0883(7) -0.0450(5) 0.0776(15) Uiso 0.50 1 d PGD A -1 
H57 H 0.3610 -0.1524 -0.0532 0.093 Uiso 0.50 1 calc PR A -1 
 
loop_ 
 _atom_site_aniso_label 
 _atom_site_aniso_U_11 
 _atom_site_aniso_U_22 
 _atom_site_aniso_U_33 
 _atom_site_aniso_U_23 
 _atom_site_aniso_U_13 
 _atom_site_aniso_U_12 
Ir1 0.01945(9) 0.02421(9) 0.02409(10) 0.01026(7) 0.00613(7) 0.01058(7) 
Ir2 0.02751(10) 0.02343(10) 0.02658(10) 0.00884(8) 0.00694(8) 0.01174(8) 
P1 0.0217(6) 0.0322(6) 0.0295(7) 0.0127(5) 0.0083(5) 0.0147(5) 
P2 0.0221(6) 0.0260(6) 0.0297(7) 0.0125(5) 0.0078(5) 0.0128(5) 
P3 0.0380(7) 0.0268(6) 0.0274(7) 0.0112(5) 0.0111(5) 0.0187(6) 
P4 0.0282(6) 0.0302(7) 0.0343(7) 0.0123(6) 0.0049(5) 0.0135(5) 
N1 0.035(2) 0.031(2) 0.028(2) 0.0086(18) 0.0068(18) 0.0156(19) 
N2 0.0244(19) 0.0244(19) 0.023(2) 0.0103(16) 0.0074(16) 0.0110(16) 
N3 0.026(2) 0.025(2) 0.035(2) 0.0152(18) 0.0130(17) 0.0096(17) 
N4 0.032(2) 0.027(2) 0.048(3) 0.014(2) 0.011(2) 0.0062(18) 
C1 0.024(2) 0.026(2) 0.027(2) 0.008(2) 0.0022(19) 0.013(2) 
C2 0.041(3) 0.038(3) 0.035(3) 0.004(2) 0.003(2) 0.009(3) 
C3 0.044(3) 0.044(3) 0.024(3) 0.010(2) 0.013(2) 0.021(3) 
C4 0.033(3) 0.040(3) 0.026(3) 0.017(2) 0.012(2) 0.016(2) 
C5 0.022(2) 0.025(2) 0.025(2) 0.0110(19) 0.0069(18) 0.0139(19) 
C6 0.019(2) 0.024(2) 0.028(2) 0.0109(19) 0.0071(18) 0.0125(18) 
C7 0.020(2) 0.023(2) 0.023(2) 0.0103(18) 0.0096(17) 0.0111(18) 
C8 0.022(2) 0.030(2) 0.027(2) 0.012(2) 0.0080(19) 0.0136(19) 
C9 0.025(2) 0.022(2) 0.026(2) 0.0103(19) 0.0067(19) 0.0089(19) 
C10 0.030(2) 0.029(2) 0.029(2) 0.017(2) 0.016(2) 0.019(2) 
C11 0.028(2) 0.021(2) 0.036(3) 0.012(2) 0.008(2) 0.009(2) 
C12 0.036(3) 0.037(3) 0.041(3) 0.018(2) 0.019(2) 0.014(2) 
C13 0.033(3) 0.042(3) 0.053(4) 0.023(3) 0.021(3) 0.007(2) 
C14 0.035(3) 0.032(3) 0.061(4) 0.012(3) 0.004(3) -0.003(2) 
C15 0.028(2) 0.032(3) 0.042(3) 0.014(2) 0.012(2) 0.016(2) 
C16 0.046(3) 0.044(3) 0.040(3) 0.008(3) 0.013(3) 0.019(3) 
C17 0.036(3) 0.046(3) 0.075(4) 0.020(3) 0.019(3) 0.024(3) 
C18 0.018(2) 0.036(3) 0.036(3) 0.011(2) 0.007(2) 0.009(2) 
C19 0.031(3) 0.056(4) 0.055(4) 0.029(3) 0.019(3) 0.013(3) 
C20 0.025(3) 0.060(4) 0.068(4) 0.025(3) 0.020(3) 0.020(3) 
C21 0.030(3) 0.058(3) 0.046(3) 0.032(3) 0.015(2) 0.032(3) 
C22 0.046(3) 0.062(4) 0.060(4) 0.042(3) 0.022(3) 0.034(3) 
C23 0.039(3) 0.073(4) 0.038(3) 0.023(3) 0.006(3) 0.030(3) 
C24 0.035(3) 0.038(3) 0.042(3) 0.024(2) 0.013(2) 0.019(2) 
C25 0.049(3) 0.062(4) 0.035(3) 0.024(3) 0.013(3) 0.029(3) 
C26 0.046(3) 0.060(4) 0.081(5) 0.048(4) 0.031(3) 0.023(3) 
C27 0.045(3) 0.029(3) 0.037(3) 0.004(2) 0.003(2) 0.024(2) 
C28 0.052(4) 0.037(3) 0.053(4) -0.004(3) -0.002(3) 0.019(3) 
C29 0.068(4) 0.051(4) 0.061(4) 0.007(3) 0.005(3) 0.044(3) 
C30 0.021(2) 0.031(3) 0.041(3) 0.017(2) 0.009(2) 0.013(2) 
C31 0.033(3) 0.064(4) 0.070(4) 0.044(3) 0.026(3) 0.029(3) 
C32 0.030(3) 0.052(3) 0.061(4) 0.031(3) 0.012(3) 0.023(3) 
C33 0.038(3) 0.034(3) 0.039(3) 0.015(2) 0.009(2) 0.022(2) 
C34 0.053(4) 0.056(4) 0.060(4) 0.020(3) 0.013(3) 0.040(3) 
C35 0.052(3) 0.048(3) 0.033(3) 0.015(3) 0.005(3) 0.029(3) 
C36 0.057(3) 0.039(3) 0.033(3) 0.014(2) 0.013(3) 0.032(3) 
C37 0.089(5) 0.060(4) 0.034(3) 0.010(3) 0.013(3) 0.049(4) 
C38 0.072(4) 0.061(4) 0.049(4) 0.030(3) 0.038(3) 0.042(3) 
C39 0.046(3) 0.024(3) 0.048(3) 0.016(2) 0.011(3) 0.013(2) 
C40 0.074(4) 0.032(3) 0.074(5) 0.021(3) 0.018(4) 0.030(3) 
C41 0.057(4) 0.040(3) 0.058(4) 0.030(3) 0.024(3) 0.022(3) 
C42 0.041(3) 0.035(3) 0.038(3) 0.012(2) 0.004(2) 0.015(2) 
C43 0.049(3) 0.038(3) 0.051(4) 0.017(3) 0.023(3) 0.011(3) 
C44 0.061(4) 0.052(4) 0.078(5) 0.030(4) 0.001(4) 0.024(3) 
C45 0.044(3) 0.069(4) 0.077(5) 0.040(4) 0.027(3) 0.036(3) 
C46 0.042(4) 0.100(6) 0.119(7) 0.066(5) 0.033(4) 0.038(4) 
C47 0.068(4) 0.093(5) 0.053(4) 0.033(4) 0.032(3) 0.061(4) 
C48 0.047(3) 0.046(3) 0.049(4) 0.010(3) -0.005(3) 0.016(3) 
C49 0.069(4) 0.050(4) 0.034(3) 0.013(3) 0.007(3) 0.026(3) 
C50 0.089(5) 0.090(6) 0.066(5) 0.012(4) -0.025(4) 0.051(5) 
 
_geom_special_details 
; 
 All esds (except the esd in the dihedral angle between two l.s. planes) 
 are estimated using the full covariance matrix.  The cell esds are taken 
 into account individually in the estimation of esds in distances, angles 
 and torsion angles; correlations between esds in cell parameters are only 
 used when they are defined by crystal symmetry.  An approximate (isotropic) 
 treatment of cell esds is used for estimating esds involving l.s. planes. 
; 
 
loop_ 
 _geom_bond_atom_site_label_1 
 _geom_bond_atom_site_label_2 
 _geom_bond_distance 
 _geom_bond_site_symmetry_2 
 _geom_bond_publ_flag 
Ir1 C1 2.057(4) . ? 
Ir1 C6 2.137(4) . ? 
Ir1 P1 2.2952(11) . ? 
Ir1 P2 2.3033(11) . ? 
Ir1 H01 1.591(10) . ? 
Ir1 H02 1.590(10) . ? 
Ir2 C11 2.053(5) . ? 
Ir2 C8 2.132(4) . ? 
Ir2 P3 2.3024(12) . ? 
Ir2 P4 2.3030(12) . ? 
Ir2 H03 1.587(10) . ? 
Ir2 H04 1.583(10) . ? 
P1 C15 1.862(5) . ? 
P1 C21 1.862(5) . ? 
P1 C18 1.867(5) . ? 
P2 C24 1.851(5) . ? 
P2 C27 1.869(5) . ? 
P2 C30 1.871(4) . ? 
P3 C36 1.871(5) . ? 
P3 C33 1.876(5) . ? 
P3 C39 1.881(5) . ? 
P4 C45 1.858(6) . ? 
P4 C48 1.861(6) . ? 
P4 C42 1.877(5) . ? 
N1 C1 1.366(5) . ? 
N1 C3 1.381(6) . ? 
N1 C2 1.463(6) . ? 
N2 C4 1.373(5) . ? 
N2 C1 1.377(5) . ? 
N2 C5 1.423(5) . ? 
N3 C11 1.372(6) . ? 
N3 C12 1.384(6) . ? 
N3 C9 1.431(5) . ? 
N4 C11 1.360(5) . ? 
N4 C13 1.383(7) . ? 
N4 C14 1.456(6) . ? 
C2 H2A 0.9800 . ? 
C2 H2B 0.9800 . ? 
C2 H2C 0.9800 . ? 
C3 C4 1.344(6) . ? 
C3 H3 0.9500 . ? 
C4 H4 0.9500 . ? 
C5 C10 1.387(6) . ? 
C5 C6 1.405(6) . ? 
C6 C7 1.424(6) . ? 
C7 C8 1.417(5) . ? 
C7 H7 0.9500 . ? 
C8 C9 1.408(6) . ? 
C9 C10 1.387(6) . ? 
C10 H10 0.9500 . ? 
C12 C13 1.337(7) . ? 
C12 H12 0.9500 . ? 
C13 H13 0.9500 . ? 
C14 H14A 0.9800 . ? 
C14 H14B 0.9800 . ? 
C14 H14C 0.9800 . ? 
C15 C17 1.531(6) . ? 
C15 C16 1.538(7) . ? 
C15 H15 1.0000 . ? 
C16 H16A 0.9800 . ? 
C16 H16B 0.9800 . ? 
C16 H16C 0.9800 . ? 
C17 H17A 0.9800 . ? 
C17 H17B 0.9800 . ? 
C17 H17C 0.9800 . ? 
C18 C19 1.536(7) . ? 
C18 C20 1.540(6) . ? 
C18 H18 1.0000 . ? 
C19 H19A 0.9800 . ? 
C19 H19B 0.9800 . ? 
C19 H19C 0.9800 . ? 
C20 H20A 0.9800 . ? 
C20 H20B 0.9800 . ? 
C20 H20C 0.9800 . ? 
C21 C23 1.536(7) . ? 
C21 C22 1.537(7) . ? 
C21 H21 1.0000 . ? 
C22 H22A 0.9800 . ? 
C22 H22B 0.9800 . ? 
C22 H22C 0.9800 . ? 
C23 H23A 0.9800 . ? 
C23 H23B 0.9800 . ? 
C23 H23C 0.9800 . ? 
C24 C25 1.519(7) . ? 
C24 C26 1.527(7) . ? 
C24 H24 1.0000 . ? 
C25 H25A 0.9800 . ? 
C25 H25B 0.9800 . ? 
C25 H25C 0.9800 . ? 
C26 H26A 0.9800 . ? 
C26 H26B 0.9800 . ? 
C26 H26C 0.9800 . ? 
C27 C29 1.535(6) . ? 
C27 C28 1.543(7) . ? 
C27 H27 1.0000 . ? 
C28 H28A 0.9800 . ? 
C28 H28B 0.9800 . ? 
C28 H28C 0.9800 . ? 
C29 H29A 0.9800 . ? 
C29 H29B 0.9800 . ? 
C29 H29C 0.9800 . ? 
C30 C31 1.525(7) . ? 
C30 C32 1.540(6) . ? 
C30 H30 1.0000 . ? 
C31 H31A 0.9800 . ? 
C31 H31B 0.9800 . ? 
C31 H31C 0.9800 . ? 
C32 H32A 0.9800 . ? 
C32 H32B 0.9800 . ? 
C32 H32C 0.9800 . ? 
C33 C34 1.532(6) . ? 
C33 C35 1.533(7) . ? 
C33 H33 1.0000 . ? 
C34 H34A 0.9800 . ? 
C34 H34B 0.9800 . ? 
C34 H34C 0.9800 . ? 
C35 H35A 0.9800 . ? 
C35 H35B 0.9800 . ? 
C35 H35C 0.9800 . ? 
C36 C37 1.516(7) . ? 
C36 C38 1.540(7) . ? 
C36 H36 1.0000 . ? 
C37 H37A 0.9800 . ? 
C37 H37B 0.9800 . ? 
C37 H37C 0.9800 . ? 
C38 H38A 0.9800 . ? 
C38 H38B 0.9800 . ? 
C38 H38C 0.9800 . ? 
C39 C40 1.532(7) . ? 
C39 C41 1.539(7) . ? 
C39 H39 1.0000 . ? 
C40 H40A 0.9800 . ? 
C40 H40B 0.9800 . ? 
C40 H40C 0.9800 . ? 
C41 H41A 0.9800 . ? 
C41 H41B 0.9800 . ? 
C41 H41C 0.9800 . ? 
C42 C43 1.529(7) . ? 
C42 C44 1.532(7) . ? 
C42 H42 1.0000 . ? 
C43 H43A 0.9800 . ? 
C43 H43B 0.9800 . ? 
C43 H43C 0.9800 . ? 
C44 H44A 0.9800 . ? 
C44 H44B 0.9800 . ? 
C44 H44C 0.9800 . ? 
C45 C47 1.532(8) . ? 
C45 C46 1.562(8) . ? 
C45 H45 1.0000 . ? 
C46 H46A 0.9800 . ? 
C46 H46B 0.9800 . ? 
C46 H46C 0.9800 . ? 
C47 H47A 0.9800 . ? 
C47 H47B 0.9800 . ? 
C47 H47C 0.9800 . ? 
C48 C50 1.528(7) . ? 
C48 C49 1.538(8) . ? 
C48 H48 1.0000 . ? 
C49 H49A 0.9800 . ? 
C49 H49B 0.9800 . ? 
C49 H49C 0.9800 . ? 
C50 H50A 0.9800 . ? 
C50 H50B 0.9800 . ? 
C50 H50C 0.9800 . ? 
C51 C52 1.331(6) . ? 
C51 H51A 0.9800 . ? 
C51 H51B 0.9800 . ? 
C51 H51C 0.9800 . ? 
C52 C53 1.3900 . ? 
C52 C57 1.3900 . ? 
C53 C54 1.3900 . ? 
C53 H53 0.9500 . ? 
C54 C55 1.3900 . ? 
C54 H54 0.9500 . ? 
C55 C56 1.3900 . ? 
C55 H55 0.9500 . ? 
C56 C57 1.3900 . ? 
C56 H56 0.9500 . ? 
C57 H57 0.9500 . ? 
 
loop_ 
 _geom_angle_atom_site_label_1 
 _geom_angle_atom_site_label_2 
 _geom_angle_atom_site_label_3 
 _geom_angle 
 _geom_angle_site_symmetry_1 
 _geom_angle_site_symmetry_3 
 _geom_angle_publ_flag 
C1 Ir1 C6 78.03(17) . . ? 
C1 Ir1 P1 101.94(12) . . ? 
C6 Ir1 P1 94.37(11) . . ? 
C1 Ir1 P2 96.50(12) . . ? 
C6 Ir1 P2 96.01(11) . . ? 
P1 Ir1 P2 160.37(4) . . ? 
C1 Ir1 H01 171.3(14) . . ? 
C6 Ir1 H01 94.0(14) . . ? 
P1 Ir1 H01 82.0(14) . . ? 
P2 Ir1 H01 80.7(14) . . ? 
C1 Ir1 H02 101.1(15) . . ? 
C6 Ir1 H02 177.3(14) . . ? 
P1 Ir1 H02 83.3(14) . . ? 
P2 Ir1 H02 86.6(14) . . ? 
H01 Ir1 H02 87(2) . . ? 
C11 Ir2 C8 78.08(17) . . ? 
C11 Ir2 P3 97.64(12) . . ? 
C8 Ir2 P3 101.04(11) . . ? 
C11 Ir2 P4 102.43(12) . . ? 
C8 Ir2 P4 94.75(11) . . ? 
P3 Ir2 P4 156.63(5) . . ? 
C11 Ir2 H03 99.4(15) . . ? 
C8 Ir2 H03 177.0(15) . . ? 
P3 Ir2 H03 80.8(14) . . ? 
P4 Ir2 H03 84.2(15) . . ? 
C11 Ir2 H04 172.4(15) . . ? 
C8 Ir2 H04 94.4(15) . . ? 
P3 Ir2 H04 84.8(15) . . ? 
P4 Ir2 H04 76.8(14) . . ? 
H03 Ir2 H04 88(2) . . ? 
C15 P1 C21 101.9(2) . . ? 
C15 P1 C18 108.7(2) . . ? 
C21 P1 C18 100.7(2) . . ? 
C15 P1 Ir1 113.49(15) . . ? 
C21 P1 Ir1 118.13(16) . . ? 
C18 P1 Ir1 112.54(15) . . ? 
C24 P2 C27 104.9(2) . . ? 
C24 P2 C30 101.8(2) . . ? 
C27 P2 C30 103.8(2) . . ? 
C24 P2 Ir1 114.48(16) . . ? 
C27 P2 Ir1 116.42(15) . . ? 
C30 P2 Ir1 113.78(14) . . ? 
C36 P3 C33 99.6(2) . . ? 
C36 P3 C39 100.8(2) . . ? 
C33 P3 C39 107.8(2) . . ? 
C36 P3 Ir2 113.63(16) . . ? 
C33 P3 Ir2 118.41(15) . . ? 
C39 P3 Ir2 114.29(17) . . ? 
C45 P4 C48 102.1(3) . . ? 
C45 P4 C42 100.7(3) . . ? 
C48 P4 C42 107.5(3) . . ? 
C45 P4 Ir2 119.0(2) . . ? 
C48 P4 Ir2 111.91(18) . . ? 
C42 P4 Ir2 114.23(16) . . ? 
C1 N1 C3 111.5(4) . . ? 
C1 N1 C2 124.8(4) . . ? 
C3 N1 C2 123.7(4) . . ? 
C4 N2 C1 111.5(4) . . ? 
C4 N2 C5 131.3(4) . . ? 
C1 N2 C5 117.1(4) . . ? 
C11 N3 C12 111.4(4) . . ? 
C11 N3 C9 117.6(4) . . ? 
C12 N3 C9 131.0(4) . . ? 
C11 N4 C13 111.3(4) . . ? 
C11 N4 C14 123.6(4) . . ? 
C13 N4 C14 125.1(4) . . ? 
N1 C1 N2 103.0(4) . . ? 
N1 C1 Ir1 140.6(3) . . ? 
N2 C1 Ir1 116.3(3) . . ? 
N1 C2 H2A 109.5 . . ? 
N1 C2 H2B 109.5 . . ? 
H2A C2 H2B 109.5 . . ? 
N1 C2 H2C 109.5 . . ? 
H2A C2 H2C 109.5 . . ? 
H2B C2 H2C 109.5 . . ? 
C4 C3 N1 106.9(4) . . ? 
C4 C3 H3 126.6 . . ? 
N1 C3 H3 126.6 . . ? 
C3 C4 N2 107.0(4) . . ? 
C3 C4 H4 126.5 . . ? 
N2 C4 H4 126.5 . . ? 
C10 C5 C6 124.3(4) . . ? 
C10 C5 N2 120.8(4) . . ? 
C6 C5 N2 114.8(4) . . ? 
C5 C6 C7 114.4(4) . . ? 
C5 C6 Ir1 113.7(3) . . ? 
C7 C6 Ir1 131.9(3) . . ? 
C8 C7 C6 125.4(4) . . ? 
C8 C7 H7 117.3 . . ? 
C6 C7 H7 117.3 . . ? 
C9 C8 C7 113.7(4) . . ? 
C9 C8 Ir2 114.1(3) . . ? 
C7 C8 Ir2 132.2(3) . . ? 
C10 C9 C8 125.1(4) . . ? 
C10 C9 N3 121.1(4) . . ? 
C8 C9 N3 113.9(4) . . ? 
C5 C10 C9 117.0(4) . . ? 
C5 C10 H10 121.5 . . ? 
C9 C10 H10 121.5 . . ? 
N4 C11 N3 103.4(4) . . ? 
N4 C11 Ir2 140.4(4) . . ? 
N3 C11 Ir2 116.1(3) . . ? 
C13 C12 N3 106.6(5) . . ? 
C13 C12 H12 126.7 . . ? 
N3 C12 H12 126.7 . . ? 
C12 C13 N4 107.4(4) . . ? 
C12 C13 H13 126.3 . . ? 
N4 C13 H13 126.3 . . ? 
N4 C14 H14A 109.5 . . ? 
N4 C14 H14B 109.5 . . ? 
H14A C14 H14B 109.5 . . ? 
N4 C14 H14C 109.5 . . ? 
H14A C14 H14C 109.5 . . ? 
H14B C14 H14C 109.5 . . ? 
C17 C15 C16 109.6(4) . . ? 
C17 C15 P1 118.1(4) . . ? 
C16 C15 P1 112.6(3) . . ? 
C17 C15 H15 105.1 . . ? 
C16 C15 H15 105.1 . . ? 
P1 C15 H15 105.1 . . ? 
C15 C16 H16A 109.5 . . ? 
C15 C16 H16B 109.5 . . ? 
H16A C16 H16B 109.5 . . ? 
C15 C16 H16C 109.5 . . ? 
H16A C16 H16C 109.5 . . ? 
H16B C16 H16C 109.5 . . ? 
C15 C17 H17A 109.5 . . ? 
C15 C17 H17B 109.5 . . ? 
H17A C17 H17B 109.5 . . ? 
C15 C17 H17C 109.5 . . ? 
H17A C17 H17C 109.5 . . ? 
H17B C17 H17C 109.5 . . ? 
C19 C18 C20 108.7(4) . . ? 
C19 C18 P1 115.0(3) . . ? 
C20 C18 P1 116.8(3) . . ? 
C19 C18 H18 105.0 . . ? 
C20 C18 H18 105.0 . . ? 
P1 C18 H18 105.0 . . ? 
C18 C19 H19A 109.5 . . ? 
C18 C19 H19B 109.5 . . ? 
H19A C19 H19B 109.5 . . ? 
C18 C19 H19C 109.5 . . ? 
H19A C19 H19C 109.5 . . ? 
H19B C19 H19C 109.5 . . ? 
C18 C20 H20A 109.5 . . ? 
C18 C20 H20B 109.5 . . ? 
H20A C20 H20B 109.5 . . ? 
C18 C20 H20C 109.5 . . ? 
H20A C20 H20C 109.5 . . ? 
H20B C20 H20C 109.5 . . ? 
C23 C21 C22 110.7(4) . . ? 
C23 C21 P1 113.0(3) . . ? 
C22 C21 P1 111.4(3) . . ? 
C23 C21 H21 107.2 . . ? 
C22 C21 H21 107.2 . . ? 
P1 C21 H21 107.2 . . ? 
C21 C22 H22A 109.5 . . ? 
C21 C22 H22B 109.5 . . ? 
H22A C22 H22B 109.5 . . ? 
C21 C22 H22C 109.5 . . ? 
H22A C22 H22C 109.5 . . ? 
H22B C22 H22C 109.5 . . ? 
C21 C23 H23A 109.5 . . ? 
C21 C23 H23B 109.5 . . ? 
H23A C23 H23B 109.5 . . ? 
C21 C23 H23C 109.5 . . ? 
H23A C23 H23C 109.5 . . ? 
H23B C23 H23C 109.5 . . ? 
C25 C24 C26 109.2(5) . . ? 
C25 C24 P2 111.0(3) . . ? 
C26 C24 P2 114.3(4) . . ? 
C25 C24 H24 107.3 . . ? 
C26 C24 H24 107.3 . . ? 
P2 C24 H24 107.3 . . ? 
C24 C25 H25A 109.5 . . ? 
C24 C25 H25B 109.5 . . ? 
H25A C25 H25B 109.5 . . ? 
C24 C25 H25C 109.5 . . ? 
H25A C25 H25C 109.5 . . ? 
H25B C25 H25C 109.5 . . ? 
C24 C26 H26A 109.5 . . ? 
C24 C26 H26B 109.5 . . ? 
H26A C26 H26B 109.5 . . ? 
C24 C26 H26C 109.5 . . ? 
H26A C26 H26C 109.5 . . ? 
H26B C26 H26C 109.5 . . ? 
C29 C27 C28 108.7(4) . . ? 
C29 C27 P2 116.8(4) . . ? 
C28 C27 P2 114.2(4) . . ? 
C29 C27 H27 105.4 . . ? 
C28 C27 H27 105.4 . . ? 
P2 C27 H27 105.4 . . ? 
C27 C28 H28A 109.5 . . ? 
C27 C28 H28B 109.5 . . ? 
H28A C28 H28B 109.5 . . ? 
C27 C28 H28C 109.5 . . ? 
H28A C28 H28C 109.5 . . ? 
H28B C28 H28C 109.5 . . ? 
C27 C29 H29A 109.5 . . ? 
C27 C29 H29B 109.5 . . ? 
H29A C29 H29B 109.5 . . ? 
C27 C29 H29C 109.5 . . ? 
H29A C29 H29C 109.5 . . ? 
H29B C29 H29C 109.5 . . ? 
C31 C30 C32 109.4(4) . . ? 
C31 C30 P2 111.4(3) . . ? 
C32 C30 P2 119.7(3) . . ? 
C31 C30 H30 105.0 . . ? 
C32 C30 H30 105.0 . . ? 
P2 C30 H30 105.0 . . ? 
C30 C31 H31A 109.5 . . ? 
C30 C31 H31B 109.5 . . ? 
H31A C31 H31B 109.5 . . ? 
C30 C31 H31C 109.5 . . ? 
H31A C31 H31C 109.5 . . ? 
H31B C31 H31C 109.5 . . ? 
C30 C32 H32A 109.5 . . ? 
C30 C32 H32B 109.5 . . ? 
H32A C32 H32B 109.5 . . ? 
C30 C32 H32C 109.5 . . ? 
H32A C32 H32C 109.5 . . ? 
H32B C32 H32C 109.5 . . ? 
C34 C33 C35 109.1(4) . . ? 
C34 C33 P3 117.2(4) . . ? 
C35 C33 P3 113.9(3) . . ? 
C34 C33 H33 105.1 . . ? 
C35 C33 H33 105.1 . . ? 
P3 C33 H33 105.1 . . ? 
C33 C34 H34A 109.5 . . ? 
C33 C34 H34B 109.5 . . ? 
H34A C34 H34B 109.5 . . ? 
C33 C34 H34C 109.5 . . ? 
H34A C34 H34C 109.5 . . ? 
H34B C34 H34C 109.5 . . ? 
C33 C35 H35A 109.5 . . ? 
C33 C35 H35B 109.5 . . ? 
H35A C35 H35B 109.5 . . ? 
C33 C35 H35C 109.5 . . ? 
H35A C35 H35C 109.5 . . ? 
H35B C35 H35C 109.5 . . ? 
C37 C36 C38 111.1(5) . . ? 
C37 C36 P3 111.9(4) . . ? 
C38 C36 P3 112.4(3) . . ? 
C37 C36 H36 107.0 . . ? 
C38 C36 H36 107.0 . . ? 
P3 C36 H36 107.0 . . ? 
C36 C37 H37A 109.5 . . ? 
C36 C37 H37B 109.5 . . ? 
H37A C37 H37B 109.5 . . ? 
C36 C37 H37C 109.5 . . ? 
H37A C37 H37C 109.5 . . ? 
H37B C37 H37C 109.5 . . ? 
C36 C38 H38A 109.5 . . ? 
C36 C38 H38B 109.5 . . ? 
H38A C38 H38B 109.5 . . ? 
C36 C38 H38C 109.5 . . ? 
H38A C38 H38C 109.5 . . ? 
H38B C38 H38C 109.5 . . ? 
C40 C39 C41 109.4(4) . . ? 
C40 C39 P3 118.5(4) . . ? 
C41 C39 P3 112.9(3) . . ? 
C40 C39 H39 104.9 . . ? 
C41 C39 H39 104.9 . . ? 
P3 C39 H39 104.9 . . ? 
C39 C40 H40A 109.5 . . ? 
C39 C40 H40B 109.5 . . ? 
H40A C40 H40B 109.5 . . ? 
C39 C40 H40C 109.5 . . ? 
H40A C40 H40C 109.5 . . ? 
H40B C40 H40C 109.5 . . ? 
C39 C41 H41A 109.5 . . ? 
C39 C41 H41B 109.5 . . ? 
H41A C41 H41B 109.5 . . ? 
C39 C41 H41C 109.5 . . ? 
H41A C41 H41C 109.5 . . ? 
H41B C41 H41C 109.5 . . ? 
C43 C42 C44 109.7(5) . . ? 
C43 C42 P4 114.1(3) . . ? 
C44 C42 P4 116.1(4) . . ? 
C43 C42 H42 105.3 . . ? 
C44 C42 H42 105.3 . . ? 
P4 C42 H42 105.3 . . ? 
C42 C43 H43A 109.5 . . ? 
C42 C43 H43B 109.5 . . ? 
H43A C43 H43B 109.5 . . ? 
C42 C43 H43C 109.5 . . ? 
H43A C43 H43C 109.5 . . ? 
H43B C43 H43C 109.5 . . ? 
C42 C44 H44A 109.5 . . ? 
C42 C44 H44B 109.5 . . ? 
H44A C44 H44B 109.5 . . ? 
C42 C44 H44C 109.5 . . ? 
H44A C44 H44C 109.5 . . ? 
H44B C44 H44C 109.5 . . ? 
C47 C45 C46 112.2(5) . . ? 
C47 C45 P4 111.1(4) . . ? 
C46 C45 P4 110.8(4) . . ? 
C47 C45 H45 107.5 . . ? 
C46 C45 H45 107.5 . . ? 
P4 C45 H45 107.5 . . ? 
C45 C46 H46A 109.5 . . ? 
C45 C46 H46B 109.5 . . ? 
H46A C46 H46B 109.5 . . ? 
C45 C46 H46C 109.5 . . ? 
H46A C46 H46C 109.5 . . ? 
H46B C46 H46C 109.5 . . ? 
C45 C47 H47A 109.5 . . ? 
C45 C47 H47B 109.5 . . ? 
H47A C47 H47B 109.5 . . ? 
C45 C47 H47C 109.5 . . ? 
H47A C47 H47C 109.5 . . ? 
H47B C47 H47C 109.5 . . ? 
C50 C48 C49 110.7(5) . . ? 
C50 C48 P4 118.6(4) . . ? 
C49 C48 P4 112.0(4) . . ? 
C50 C48 H48 104.7 . . ? 
C49 C48 H48 104.7 . . ? 
P4 C48 H48 104.7 . . ? 
C48 C49 H49A 109.5 . . ? 
C48 C49 H49B 109.5 . . ? 
H49A C49 H49B 109.5 . . ? 
C48 C49 H49C 109.5 . . ? 
H49A C49 H49C 109.5 . . ? 
H49B C49 H49C 109.5 . . ? 
C48 C50 H50A 109.5 . . ? 
C48 C50 H50B 109.5 . . ? 
H50A C50 H50B 109.5 . . ? 
C48 C50 H50C 109.5 . . ? 
H50A C50 H50C 109.5 . . ? 
H50B C50 H50C 109.5 . . ? 
C52 C51 H51A 109.5 . . ? 
C52 C51 H51B 109.5 . . ? 
H51A C51 H51B 109.5 . . ? 
C52 C51 H51C 109.5 . . ? 
H51A C51 H51C 109.5 . . ? 
H51B C51 H51C 109.5 . . ? 
C51 C52 C53 120.6(5) . . ? 
C51 C52 C57 119.3(5) . . ? 
C53 C52 C57 120.0 . . ? 
C52 C53 C54 120.0 . . ? 
C52 C53 H53 120.0 . . ? 
C54 C53 H53 120.0 . . ? 
C55 C54 C53 120.0 . . ? 
C55 C54 H54 120.0 . . ? 
C53 C54 H54 120.0 . . ? 
C54 C55 C56 120.0 . . ? 
C54 C55 H55 120.0 . . ? 
C56 C55 H55 120.0 . . ? 
C57 C56 C55 120.0 . . ? 
C57 C56 H56 120.0 . . ? 
C55 C56 H56 120.0 . . ? 
C56 C57 C52 120.0 . . ? 
C56 C57 H57 120.0 . . ? 
C52 C57 H57 120.0 . . ? 
 
_diffrn_measured_fraction_theta_max    0.894 
_diffrn_reflns_theta_full              27.50 
_diffrn_measured_fraction_theta_full   0.992 
_refine_diff_density_max    1.354 
_refine_diff_density_min   -1.278 
_refine_diff_density_rms    0.141 

#===END
# ---------------------------------------------------------------------
# Data for compound 3 
   
 
data_3-enriquen75 
 
_audit_creation_method            SHELXL-97 
_chemical_name_systematic 
; 
 ? 
; 
_chemical_name_common             ? 
_chemical_melting_point           ? 
_chemical_formula_moiety          ? 
_chemical_formula_sum 
 'C56 H104 Ir2 N4 P4' 
_chemical_formula_weight          1341.71 
 
loop_ 
 _atom_type_symbol 
 _atom_type_description 
 _atom_type_scat_dispersion_real 
 _atom_type_scat_dispersion_imag 
 _atom_type_scat_source 
 'C'  'C'   0.0033   0.0016 
 'International Tables Vol C Tables 4.2.6.8 and 6.1.1.4' 
 'H'  'H'   0.0000   0.0000 
 'International Tables Vol C Tables 4.2.6.8 and 6.1.1.4' 
 'N'  'N'   0.0061   0.0033 
 'International Tables Vol C Tables 4.2.6.8 and 6.1.1.4' 
 'P'  'P'   0.1023   0.0942 
 'International Tables Vol C Tables 4.2.6.8 and 6.1.1.4' 
 'Ir'  'Ir'  -1.4442   7.9887 
 'International Tables Vol C Tables 4.2.6.8 and 6.1.1.4' 
 
_symmetry_cell_setting            'monoclinic' 
_symmetry_space_group_name_H-M    'P21/n'
 
loop_ 
 _symmetry_equiv_pos_as_xyz 
 'x, y, z' 
 '-x+1/2, y+1/2, -z+1/2' 
 '-x, -y, -z' 
 'x-1/2, -y-1/2, z-1/2' 
 
_cell_length_a                    10.226(4) 
_cell_length_b                    15.478(5) 
_cell_length_c                    19.630(7) 
_cell_angle_alpha                 90.00 
_cell_angle_beta                  98.770(5) 
_cell_angle_gamma                 90.00 
_cell_volume                      3070.7(19) 
_cell_formula_units_Z             2 
_cell_measurement_temperature     100(2) 
_cell_measurement_reflns_used     9787 
_cell_measurement_theta_min       2 
_cell_measurement_theta_max       28 
 
_exptl_crystal_description        'irregular block' 
_exptl_crystal_colour             'colourless'
_exptl_crystal_size_max           0.13 
_exptl_crystal_size_mid           0.05 
_exptl_crystal_size_min           0.05 
_exptl_crystal_density_meas       ? 
_exptl_crystal_density_diffrn     1.451 
_exptl_crystal_density_method     'not measured' 
_exptl_crystal_F_000              1364 
_exptl_absorpt_coefficient_mu     4.470 
_exptl_absorpt_correction_type    'multi-scan' 
_exptl_absorpt_correction_T_min   0.647 
_exptl_absorpt_correction_T_max   0.862 
_exptl_absorpt_process_details    
;
Absorption correction performed with SADABS program. This is based on the
method of Blessing: Blessing, R. H., Acta Crystallogr., Sect. A 1995, 51, 33.

SADABS: Area-Detector Absorption Correction. Bruker-AXS 
within SAINT+ package, v. 6.1 (2000).
;
 
_diffrn_ambient_temperature       100(2) 
_diffrn_radiation_wavelength      0.71073 
_diffrn_radiation_type            MoK\a 
_diffrn_radiation_source          'fine-focus sealed tube' 
_diffrn_radiation_monochromator   graphite 
_diffrn_measurement_device_type   'Bruker APEX DUO system' 
_diffrn_measurement_method        '\w rotations with narrow frames' 
_diffrn_detector_area_resol_mean  8.33 
_diffrn_standards_decay_%         0 
_diffrn_reflns_number             33139 
_diffrn_reflns_av_R_equivalents   0.0469 
_diffrn_reflns_av_sigmaI/netI     0.0435 
_diffrn_reflns_limit_h_min        -13 
_diffrn_reflns_limit_h_max        13 
_diffrn_reflns_limit_k_min        -21 
_diffrn_reflns_limit_k_max        21 
_diffrn_reflns_limit_l_min        -26 
_diffrn_reflns_limit_l_max        26 
_diffrn_reflns_theta_min          1.68 
_diffrn_reflns_theta_max          29.57 
_reflns_number_total              8053 
_reflns_number_gt                 6480 
_reflns_threshold_expression      >2sigma(I) 
 
_computing_data_collection        'apex2 v. 7.0 (Bruker AXS, 2009)' 
_computing_cell_refinement        'SAINT+ v. 7.56a (Bruker AXS, 2008)' 
_computing_data_reduction         'SAINT+ v. 7.56a (Bruker AXS, 2008)' 
_computing_structure_solution     'SHELXS-97 (Sheldrick, 1990)' 
_computing_structure_refinement   'SHELXL-97 (Sheldrick, 1997)' 
_computing_molecular_graphics     'XP, SHELXTL v. 6.14 (Bruker, 2000)' 
_computing_publication_material   'XCIF, SHELXTL v. 6.14 (Bruker, 2000)'
 
_refine_special_details 
; 
 Refinement of F^2^ against ALL reflections.  The weighted R-factor wR and 
 goodness of fit S are based on F^2^, conventional R-factors R are based 
 on F, with F set to zero for negative F^2^. The threshold expression of 
 F^2^ > 2sigma(F^2^) is used only for calculating R-factors(gt) etc. and is 
 not relevant to the choice of reflections for refinement.  R-factors based 
 on F^2^ are statistically about twice as large as those based on F, and R- 
 factors based on ALL data will be even larger. 
; 
 
_refine_ls_structure_factor_coef  Fsqd  
_refine_ls_matrix_type            full 
_refine_ls_weighting_scheme       calc  
_refine_ls_weighting_details 
 'calc w=1/[\s^2^(Fo^2^)+(0.0332P)^2^+0.0000P] where P=(Fo^2^+2Fc^2^)/3' 
_atom_sites_solution_primary      direct 
_atom_sites_solution_secondary    difmap 
_atom_sites_solution_hydrogens    geom 
_refine_ls_hydrogen_treatment     mixed 
_refine_ls_extinction_method      none 
_refine_ls_extinction_coef        ? 
_refine_ls_number_reflns          8053 
_refine_ls_number_parameters      312 
_refine_ls_number_restraints      4 
_refine_ls_R_factor_all           0.0422 
_refine_ls_R_factor_gt            0.0289 
_refine_ls_wR_factor_ref          0.0670 
_refine_ls_wR_factor_gt           0.0620 
_refine_ls_goodness_of_fit_ref    0.987 
_refine_ls_restrained_S_all       0.988 
_refine_ls_shift/su_max           0.002 
_refine_ls_shift/su_mean          0.000 
 
loop_ 
 _atom_site_label 
 _atom_site_type_symbol 
 _atom_site_fract_x 
 _atom_site_fract_y 
 _atom_site_fract_z 
 _atom_site_U_iso_or_equiv 
 _atom_site_adp_type 
 _atom_site_occupancy 
 _atom_site_symmetry_multiplicity 
 _atom_site_calc_flag 
 _atom_site_refinement_flags 
 _atom_site_disorder_assembly 
 _atom_site_disorder_group 
Ir Ir 0.672034(11) 0.214085(7) 0.916522(6) 0.02174(4) Uani 1 1 d D A . 
H01 H 0.758(3) 0.1399(14) 0.9578(14) 0.026 Uiso 1 1 d D . . 
H02 H 0.8024(19) 0.2588(19) 0.8983(15) 0.026 Uiso 1 1 d D . . 
P1 P 0.72449(9) 0.29846(5) 1.01327(4) 0.02670(18) Uani 1 1 d . . . 
P2 P 0.68685(8) 0.12645(5) 0.82349(4) 0.02375(17) Uani 1 1 d . . . 
N1 N 0.3833(3) 0.21922(17) 0.90464(15) 0.0302(6) Uani 1 1 d . A . 
N2 N 0.4379(3) 0.10909(19) 0.96898(15) 0.0354(7) Uani 1 1 d . A . 
C1 C 0.4909(3) 0.1728(2) 0.93460(16) 0.0278(7) Uani 1 1 d . . . 
C2 C 0.2670(4) 0.1850(3) 0.9202(2) 0.0435(9) Uani 1 1 d . . . 
H2 H 0.1800 0.2058 0.9051 0.052 Uiso 1 1 calc R A . 
C3 C 0.3013(4) 0.1166(3) 0.9608(2) 0.0507(11) Uani 1 1 d . A . 
H3 H 0.2426 0.0799 0.9805 0.061 Uiso 1 1 calc R . . 
C4 C 0.5153(4) 0.0460(2) 1.01254(19) 0.0406(9) Uani 1 1 d . . . 
H4A H 0.4963 0.0518 1.0603 0.049 Uiso 1 1 calc R A . 
H4B H 0.6106 0.0579 1.0131 0.049 Uiso 1 1 calc R . . 
C5 C 0.4072(3) 0.29203(19) 0.86412(17) 0.0266(7) Uani 1 1 d . . . 
C6 C 0.5431(3) 0.30698(19) 0.86131(15) 0.0244(7) Uani 1 1 d . A . 
C7 C 0.5649(4) 0.3800(2) 0.82282(17) 0.0323(8) Uani 1 1 d . . . 
H7 H 0.6536 0.3949 0.8190 0.039 Uiso 1 1 calc R A . 
C8 C 0.4640(4) 0.4317(2) 0.78984(19) 0.0399(9) Uani 1 1 d . A . 
H8 H 0.4849 0.4811 0.7648 0.048 Uiso 1 1 calc R . . 
C9 C 0.3334(4) 0.4122(2) 0.7932(2) 0.0441(9) Uani 1 1 d . . . 
H9 H 0.2644 0.4469 0.7695 0.053 Uiso 1 1 calc R A . 
C10 C 0.3040(3) 0.3419(2) 0.83109(18) 0.0372(8) Uani 1 1 d . A . 
H10 H 0.2148 0.3278 0.8345 0.045 Uiso 1 1 calc R . . 
C11 C 0.7550(4) 0.4142(2) 0.99499(18) 0.0405(9) Uani 1 1 d . A . 
H11 H 0.6693 0.4365 0.9698 0.049 Uiso 1 1 calc R . . 
C12 C 0.7883(5) 0.4728(3) 1.0584(2) 0.0595(12) Uani 1 1 d . . . 
H12A H 0.8711 0.4535 1.0859 0.089 Uiso 1 1 calc R A . 
H12B H 0.7167 0.4698 1.0863 0.089 Uiso 1 1 calc R . . 
H12C H 0.7982 0.5325 1.0433 0.089 Uiso 1 1 calc R . . 
C13 C 0.8566(4) 0.4290(3) 0.94634(19) 0.0526(11) Uani 1 1 d . . . 
H13A H 0.8511 0.4890 0.9301 0.079 Uiso 1 1 calc R A . 
H13B H 0.8380 0.3899 0.9068 0.079 Uiso 1 1 calc R . . 
H13C H 0.9457 0.4177 0.9710 0.079 Uiso 1 1 calc R . . 
C14 C 0.8733(4) 0.2625(3) 1.07294(18) 0.0430(9) Uani 1 1 d D A . 
H14A H 0.8914 0.3052 1.1114 0.052 Uiso 0.748(6) 1 calc PR A 1 
H14B H 0.8947 0.3163 1.1005 0.052 Uiso 0.252(6) 1 calc PR A 2 
C15A C 0.8467(6) 0.1728(4) 1.1041(3) 0.0508(16) Uiso 0.748(6) 1 d PD A 1 
H15A H 0.8413 0.1286 1.0680 0.076 Uiso 0.748(6) 1 calc PR A 1 
H15B H 0.7631 0.1747 1.1227 0.076 Uiso 0.748(6) 1 calc PR A 1 
H15C H 0.9191 0.1587 1.1411 0.076 Uiso 0.748(6) 1 calc PR A 1 
C15B C 0.869(3) 0.1981(13) 1.1297(10) 0.073(7) Uiso 0.252(6) 1 d PD A 2 
H15D H 0.7962 0.1573 1.1162 0.110 Uiso 0.252(6) 1 calc PR A 2 
H15E H 0.8550 0.2284 1.1718 0.110 Uiso 0.252(6) 1 calc PR A 2 
H15F H 0.9528 0.1664 1.1381 0.110 Uiso 0.252(6) 1 calc PR A 2 
C16 C 0.9956(4) 0.2539(3) 1.0393(2) 0.0597(12) Uani 1 1 d . . . 
H16A H 1.0686 0.2318 1.0729 0.089 Uiso 1 1 calc R A . 
H16B H 1.0195 0.3107 1.0227 0.089 Uiso 1 1 calc R . . 
H16C H 0.9782 0.2138 1.0004 0.089 Uiso 1 1 calc R . . 
C17A C 0.5885(7) 0.2994(4) 1.0692(3) 0.0413(13) Uiso 0.748(6) 1 d P A 1 
H17A H 0.5521 0.2393 1.0670 0.050 Uiso 0.748(6) 1 calc PR A 1 
C18A C 0.4749(7) 0.3565(4) 1.0391(3) 0.0531(11) Uiso 0.748(6) 1 d P A 1 
H18A H 0.3949 0.3394 1.0575 0.080 Uiso 0.748(6) 1 calc PR A 1 
H18B H 0.4598 0.3503 0.9888 0.080 Uiso 0.748(6) 1 calc PR A 1 
H18C H 0.4962 0.4168 1.0513 0.080 Uiso 0.748(6) 1 calc PR A 1 
C19A C 0.6253(6) 0.3197(4) 1.1464(3) 0.0531(11) Uiso 0.748(6) 1 d P A 1 
H19A H 0.6567 0.3795 1.1521 0.080 Uiso 0.748(6) 1 calc PR A 1 
H19B H 0.6954 0.2804 1.1670 0.080 Uiso 0.748(6) 1 calc PR A 1 
H19C H 0.5473 0.3123 1.1692 0.080 Uiso 0.748(6) 1 calc PR A 1 
C17B C 0.610(2) 0.3217(13) 1.0713(10) 0.0413(13) Uiso 0.252(6) 1 d P A 2 
H17B H 0.6619 0.3502 1.1125 0.050 Uiso 0.252(6) 1 calc PR A 2 
C18B C 0.499(2) 0.3888(13) 1.0400(10) 0.0531(11) Uiso 0.252(6) 1 d P A 2 
H18D H 0.4507 0.3657 0.9969 0.080 Uiso 0.252(6) 1 calc PR A 2 
H18E H 0.5410 0.4437 1.0307 0.080 Uiso 0.252(6) 1 calc PR A 2 
H18F H 0.4378 0.3983 1.0730 0.080 Uiso 0.252(6) 1 calc PR A 2 
C19B C 0.5516(18) 0.2374(11) 1.0977(9) 0.0531(11) Uiso 0.252(6) 1 d P A 2 
H19D H 0.5248 0.2480 1.1428 0.080 Uiso 0.252(6) 1 calc PR A 2 
H19E H 0.6188 0.1917 1.1019 0.080 Uiso 0.252(6) 1 calc PR A 2 
H19F H 0.4744 0.2192 1.0650 0.080 Uiso 0.252(6) 1 calc PR A 2 
C20 C 0.8263(3) 0.0482(2) 0.83539(17) 0.0325(8) Uani 1 1 d . A . 
H20 H 0.8227 0.0146 0.7916 0.039 Uiso 1 1 calc R . . 
C21 C 0.8138(4) -0.0158(2) 0.8931(2) 0.0478(10) Uani 1 1 d . . . 
H21A H 0.8825 -0.0601 0.8945 0.072 Uiso 1 1 calc R A . 
H21B H 0.7264 -0.0431 0.8847 0.072 Uiso 1 1 calc R . . 
H21C H 0.8244 0.0149 0.9373 0.072 Uiso 1 1 calc R . . 
C22 C 0.9614(4) 0.0919(3) 0.8499(2) 0.0480(10) Uani 1 1 d . . . 
H22A H 0.9629 0.1322 0.8885 0.072 Uiso 1 1 calc R A . 
H22B H 0.9779 0.1236 0.8088 0.072 Uiso 1 1 calc R . . 
H22C H 1.0302 0.0480 0.8616 0.072 Uiso 1 1 calc R . . 
C23 C 0.6989(4) 0.1833(2) 0.74116(18) 0.0384(9) Uani 1 1 d . A . 
H23 H 0.6114 0.2122 0.7273 0.046 Uiso 1 1 calc R . . 
C24 C 0.8025(5) 0.2553(3) 0.7467(2) 0.0538(11) Uani 1 1 d . . . 
H24A H 0.8907 0.2298 0.7488 0.081 Uiso 1 1 calc R A . 
H24B H 0.7988 0.2891 0.7886 0.081 Uiso 1 1 calc R . . 
H24C H 0.7843 0.2931 0.7063 0.081 Uiso 1 1 calc R . . 
C25 C 0.7182(5) 0.1236(3) 0.68087(19) 0.0547(12) Uani 1 1 d . . . 
H25A H 0.7214 0.1584 0.6394 0.082 Uiso 1 1 calc R A . 
H25B H 0.6442 0.0828 0.6723 0.082 Uiso 1 1 calc R . . 
H25C H 0.8012 0.0916 0.6925 0.082 Uiso 1 1 calc R . . 
C26 C 0.5404(3) 0.0545(2) 0.80003(18) 0.0316(7) Uani 1 1 d . A . 
H26 H 0.5148 0.0365 0.8451 0.038 Uiso 1 1 calc R . . 
C27 C 0.4214(4) 0.1060(2) 0.7640(2) 0.0435(9) Uani 1 1 d . . . 
H27A H 0.4275 0.1113 0.7148 0.065 Uiso 1 1 calc R A . 
H27B H 0.4214 0.1636 0.7846 0.065 Uiso 1 1 calc R . . 
H27C H 0.3395 0.0758 0.7696 0.065 Uiso 1 1 calc R . . 
C28 C 0.5541(4) -0.0302(2) 0.7613(2) 0.0477(10) Uani 1 1 d . . . 
H28A H 0.4797 -0.0684 0.7664 0.072 Uiso 1 1 calc R A . 
H28B H 0.6373 -0.0586 0.7804 0.072 Uiso 1 1 calc R . . 
H28C H 0.5540 -0.0179 0.7123 0.072 Uiso 1 1 calc R . . 
 
loop_ 
 _atom_site_aniso_label 
 _atom_site_aniso_U_11 
 _atom_site_aniso_U_22 
 _atom_site_aniso_U_33 
 _atom_site_aniso_U_23 
 _atom_site_aniso_U_13 
 _atom_site_aniso_U_12 
Ir 0.02147(7) 0.02000(7) 0.02396(7) -0.00126(5) 0.00410(5) -0.00212(5) 
P1 0.0311(5) 0.0258(4) 0.0229(4) -0.0016(3) 0.0032(3) 0.0001(3) 
P2 0.0256(4) 0.0200(4) 0.0253(4) -0.0020(3) 0.0030(3) -0.0001(3) 
N1 0.0251(14) 0.0304(16) 0.0352(15) 0.0062(12) 0.0052(12) 0.0010(12) 
N2 0.0297(15) 0.0367(17) 0.0395(16) 0.0135(13) 0.0039(13) -0.0080(13) 
C1 0.0302(17) 0.0262(17) 0.0280(16) 0.0004(13) 0.0076(14) -0.0022(14) 
C2 0.0216(18) 0.052(2) 0.056(2) 0.0132(19) 0.0057(17) -0.0056(17) 
C3 0.029(2) 0.061(3) 0.063(3) 0.026(2) 0.0076(19) -0.0109(19) 
C4 0.039(2) 0.038(2) 0.043(2) 0.0171(16) -0.0010(17) -0.0087(17) 
C5 0.0278(17) 0.0240(17) 0.0281(16) 0.0012(12) 0.0049(13) 0.0007(13) 
C6 0.0298(17) 0.0195(15) 0.0246(15) -0.0017(12) 0.0064(13) -0.0005(13) 
C7 0.0360(19) 0.0278(18) 0.0344(18) 0.0023(14) 0.0095(15) -0.0028(15) 
C8 0.049(2) 0.0290(19) 0.041(2) 0.0129(15) 0.0046(18) 0.0000(17) 
C9 0.045(2) 0.035(2) 0.049(2) 0.0121(17) -0.0012(19) 0.0144(18) 
C10 0.0256(17) 0.037(2) 0.048(2) 0.0030(16) 0.0030(16) 0.0059(15) 
C11 0.059(3) 0.0224(18) 0.0361(19) -0.0053(14) -0.0050(18) -0.0003(17) 
C12 0.090(4) 0.037(2) 0.050(2) -0.0148(19) 0.003(2) -0.007(2) 
C13 0.076(3) 0.039(2) 0.040(2) 0.0025(17) 0.000(2) -0.027(2) 
C14 0.047(2) 0.046(2) 0.0311(19) -0.0086(16) -0.0092(17) 0.0102(19) 
C16 0.036(2) 0.070(3) 0.067(3) 0.005(3) -0.010(2) 0.000(2) 
C20 0.0301(18) 0.0345(19) 0.0322(17) -0.0088(14) 0.0029(14) 0.0078(15) 
C21 0.054(3) 0.039(2) 0.049(2) 0.0059(17) 0.005(2) 0.0229(19) 
C22 0.0287(19) 0.063(3) 0.053(2) -0.019(2) 0.0059(18) 0.0018(19) 
C23 0.055(2) 0.0321(19) 0.0289(17) -0.0006(15) 0.0090(17) 0.0015(18) 
C24 0.079(3) 0.043(2) 0.046(2) -0.0029(19) 0.030(2) -0.015(2) 
C25 0.083(3) 0.047(3) 0.035(2) -0.0063(18) 0.014(2) 0.000(2) 
C26 0.0297(18) 0.0213(16) 0.0418(19) -0.0041(14) -0.0011(15) -0.0005(14) 
C27 0.036(2) 0.033(2) 0.056(2) -0.0126(17) -0.0090(18) 0.0035(17) 
C28 0.046(2) 0.027(2) 0.066(3) -0.0162(18) -0.004(2) -0.0033(17) 
 
_geom_special_details 
; 
 All esds (except the esd in the dihedral angle between two l.s. planes) 
 are estimated using the full covariance matrix.  The cell esds are taken 
 into account individually in the estimation of esds in distances, angles 
 and torsion angles; correlations between esds in cell parameters are only 
 used when they are defined by crystal symmetry.  An approximate (isotropic) 
 treatment of cell esds is used for estimating esds involving l.s. planes. 
; 
 
loop_ 
 _geom_bond_atom_site_label_1 
 _geom_bond_atom_site_label_2 
 _geom_bond_distance 
 _geom_bond_site_symmetry_2 
 _geom_bond_publ_flag 
Ir C1 2.041(3) . ? 
Ir C6 2.132(3) . ? 
Ir P2 2.2983(10) . ? 
Ir P1 2.2998(10) . ? 
Ir H01 1.591(10) . ? 
Ir H02 1.590(10) . ? 
P1 C17B 1.79(2) . ? 
P1 C14 1.858(4) . ? 
P1 C11 1.863(4) . ? 
P1 C17A 1.899(7) . ? 
P2 C20 1.859(3) . ? 
P2 C23 1.861(4) . ? 
P2 C26 1.867(3) . ? 
N1 C1 1.369(4) . ? 
N1 C2 1.378(4) . ? 
N1 C5 1.422(4) . ? 
N2 C1 1.354(4) . ? 
N2 C3 1.387(5) . ? 
N2 C4 1.451(4) . ? 
C2 C3 1.340(5) . ? 
C2 H2 0.9500 . ? 
C3 H3 0.9500 . ? 
C4 C4 1.525(7) 3_657 ? 
C4 H4A 0.9900 . ? 
C4 H4B 0.9900 . ? 
C5 C10 1.386(4) . ? 
C5 C6 1.418(4) . ? 
C6 C7 1.395(4) . ? 
C7 C8 1.386(5) . ? 
C7 H7 0.9500 . ? 
C8 C9 1.381(5) . ? 
C8 H8 0.9500 . ? 
C9 C10 1.377(5) . ? 
C9 H9 0.9500 . ? 
C10 H10 0.9500 . ? 
C11 C13 1.532(5) . ? 
C11 C12 1.535(5) . ? 
C11 H11 1.0000 . ? 
C12 H12A 0.9800 . ? 
C12 H12B 0.9800 . ? 
C12 H12C 0.9800 . ? 
C13 H13A 0.9800 . ? 
C13 H13B 0.9800 . ? 
C13 H13C 0.9800 . ? 
C14 C16 1.507(6) . ? 
C14 C15B 1.501(9) . ? 
C14 C15A 1.556(6) . ? 
C14 H14A 1.0000 . ? 
C14 H14B 1.0000 . ? 
C15A H15A 0.9800 . ? 
C15A H15B 0.9800 . ? 
C15A H15C 0.9800 . ? 
C15B H15D 0.9800 . ? 
C15B H15E 0.9800 . ? 
C15B H15F 0.9800 . ? 
C16 H16A 0.9800 . ? 
C16 H16B 0.9800 . ? 
C16 H16C 0.9800 . ? 
C17A C18A 1.507(9) . ? 
C17A C19A 1.536(9) . ? 
C17A H17A 1.0000 . ? 
C18A H18A 0.9800 . ? 
C18A H18B 0.9800 . ? 
C18A H18C 0.9800 . ? 
C19A H19A 0.9800 . ? 
C19A H19B 0.9800 . ? 
C19A H19C 0.9800 . ? 
C17B C19B 1.56(3) . ? 
C17B C18B 1.59(3) . ? 
C17B H17B 1.0000 . ? 
C18B H18D 0.9800 . ? 
C18B H18E 0.9800 . ? 
C18B H18F 0.9800 . ? 
C19B H19D 0.9800 . ? 
C19B H19E 0.9800 . ? 
C19B H19F 0.9800 . ? 
C20 C21 1.525(5) . ? 
C20 C22 1.526(5) . ? 
C20 H20 1.0000 . ? 
C21 H21A 0.9800 . ? 
C21 H21B 0.9800 . ? 
C21 H21C 0.9800 . ? 
C22 H22A 0.9800 . ? 
C22 H22B 0.9800 . ? 
C22 H22C 0.9800 . ? 
C23 C24 1.530(6) . ? 
C23 C25 1.538(5) . ? 
C23 H23 1.0000 . ? 
C24 H24A 0.9800 . ? 
C24 H24B 0.9800 . ? 
C24 H24C 0.9800 . ? 
C25 H25A 0.9800 . ? 
C25 H25B 0.9800 . ? 
C25 H25C 0.9800 . ? 
C26 C28 1.533(5) . ? 
C26 C27 1.534(5) . ? 
C26 H26 1.0000 . ? 
C27 H27A 0.9800 . ? 
C27 H27B 0.9800 . ? 
C27 H27C 0.9800 . ? 
C28 H28A 0.9800 . ? 
C28 H28B 0.9800 . ? 
C28 H28C 0.9800 . ? 
 
loop_ 
 _geom_angle_atom_site_label_1 
 _geom_angle_atom_site_label_2 
 _geom_angle_atom_site_label_3 
 _geom_angle 
 _geom_angle_site_symmetry_1 
 _geom_angle_site_symmetry_3 
 _geom_angle_publ_flag 
C1 Ir C6 78.00(13) . . ? 
C1 Ir P2 97.19(9) . . ? 
C6 Ir P2 96.00(8) . . ? 
C1 Ir P1 97.91(9) . . ? 
C6 Ir P1 94.89(9) . . ? 
P2 Ir P1 162.93(3) . . ? 
C1 Ir H01 97.5(11) . . ? 
C6 Ir H01 175.3(11) . . ? 
P2 Ir H01 83.2(11) . . ? 
P1 Ir H01 87.0(11) . . ? 
C1 Ir H02 171.6(12) . . ? 
C6 Ir H02 93.8(12) . . ? 
P2 Ir H02 85.4(11) . . ? 
P1 Ir H02 80.8(11) . . ? 
H01 Ir H02 90.7(16) . . ? 
C17B P1 C14 102.2(7) . . ? 
C17B P1 C11 94.3(7) . . ? 
C14 P1 C11 105.35(18) . . ? 
C17B P1 C17A 12.2(7) . . ? 
C14 P1 C17A 103.8(2) . . ? 
C11 P1 C17A 105.3(2) . . ? 
C17B P1 Ir 123.1(7) . . ? 
C14 P1 Ir 114.56(12) . . ? 
C11 P1 Ir 114.32(12) . . ? 
C17A P1 Ir 112.5(2) . . ? 
C20 P2 C23 105.44(17) . . ? 
C20 P2 C26 102.33(15) . . ? 
C23 P2 C26 102.98(17) . . ? 
C20 P2 Ir 115.28(11) . . ? 
C23 P2 Ir 115.61(12) . . ? 
C26 P2 Ir 113.61(11) . . ? 
C1 N1 C2 111.6(3) . . ? 
C1 N1 C5 117.4(3) . . ? 
C2 N1 C5 131.0(3) . . ? 
C1 N2 C3 110.7(3) . . ? 
C1 N2 C4 124.1(3) . . ? 
C3 N2 C4 125.0(3) . . ? 
N2 C1 N1 103.9(3) . . ? 
N2 C1 Ir 139.2(3) . . ? 
N1 C1 Ir 116.9(2) . . ? 
C3 C2 N1 106.2(3) . . ? 
C3 C2 H2 126.9 . . ? 
N1 C2 H2 126.9 . . ? 
C2 C3 N2 107.6(3) . . ? 
C2 C3 H3 126.2 . . ? 
N2 C3 H3 126.2 . . ? 
N2 C4 C4 111.8(4) . 3_657 ? 
N2 C4 H4A 109.3 . . ? 
C4 C4 H4A 109.3 3_657 . ? 
N2 C4 H4B 109.3 . . ? 
C4 C4 H4B 109.3 3_657 . ? 
H4A C4 H4B 107.9 . . ? 
C10 C5 C6 124.9(3) . . ? 
C10 C5 N1 121.3(3) . . ? 
C6 C5 N1 113.8(3) . . ? 
C7 C6 C5 113.0(3) . . ? 
C7 C6 Ir 133.2(3) . . ? 
C5 C6 Ir 113.8(2) . . ? 
C8 C7 C6 123.5(3) . . ? 
C8 C7 H7 118.2 . . ? 
C6 C7 H7 118.2 . . ? 
C9 C8 C7 120.5(3) . . ? 
C9 C8 H8 119.8 . . ? 
C7 C8 H8 119.8 . . ? 
C10 C9 C8 119.4(3) . . ? 
C10 C9 H9 120.3 . . ? 
C8 C9 H9 120.3 . . ? 
C9 C10 C5 118.7(3) . . ? 
C9 C10 H10 120.7 . . ? 
C5 C10 H10 120.7 . . ? 
C13 C11 C12 109.2(3) . . ? 
C13 C11 P1 114.4(3) . . ? 
C12 C11 P1 115.8(3) . . ? 
C13 C11 H11 105.5 . . ? 
C12 C11 H11 105.5 . . ? 
P1 C11 H11 105.5 . . ? 
C11 C12 H12A 109.5 . . ? 
C11 C12 H12B 109.5 . . ? 
H12A C12 H12B 109.5 . . ? 
C11 C12 H12C 109.5 . . ? 
H12A C12 H12C 109.5 . . ? 
H12B C12 H12C 109.5 . . ? 
C11 C13 H13A 109.5 . . ? 
C11 C13 H13B 109.5 . . ? 
H13A C13 H13B 109.5 . . ? 
C11 C13 H13C 109.5 . . ? 
H13A C13 H13C 109.5 . . ? 
H13B C13 H13C 109.5 . . ? 
C16 C14 C15B 112.8(10) . . ? 
C16 C14 C15A 107.5(4) . . ? 
C15B C14 C15A 24.5(10) . . ? 
C16 C14 P1 113.9(3) . . ? 
C15B C14 P1 123.6(10) . . ? 
C15A C14 P1 109.9(3) . . ? 
C16 C14 H14A 108.5 . . ? 
C15B C14 H14A 84.4 . . ? 
C15A C14 H14A 108.5 . . ? 
P1 C14 H14A 108.5 . . ? 
C16 C14 H14B 100.5 . . ? 
C15B C14 H14B 100.5 . . ? 
C15A C14 H14B 124.6 . . ? 
P1 C14 H14B 100.5 . . ? 
H14A C14 H14B 16.1 . . ? 
C14 C15A H15A 109.5 . . ? 
C14 C15A H15B 109.5 . . ? 
C14 C15A H15C 109.5 . . ? 
C14 C15B H15D 109.5 . . ? 
C14 C15B H15E 109.5 . . ? 
H15D C15B H15E 109.5 . . ? 
C14 C15B H15F 109.5 . . ? 
H15D C15B H15F 109.5 . . ? 
H15E C15B H15F 109.5 . . ? 
C14 C16 H16A 109.5 . . ? 
C14 C16 H16B 109.5 . . ? 
H16A C16 H16B 109.5 . . ? 
C14 C16 H16C 109.5 . . ? 
H16A C16 H16C 109.5 . . ? 
H16B C16 H16C 109.5 . . ? 
C18A C17A C19A 109.0(5) . . ? 
C18A C17A P1 111.4(5) . . ? 
C19A C17A P1 118.7(4) . . ? 
C18A C17A H17A 105.5 . . ? 
C19A C17A H17A 105.5 . . ? 
P1 C17A H17A 105.5 . . ? 
C19B C17B C18B 113.0(15) . . ? 
C19B C17B P1 111.4(13) . . ? 
C18B C17B P1 112.4(13) . . ? 
C19B C17B H17B 106.5 . . ? 
C18B C17B H17B 106.5 . . ? 
P1 C17B H17B 106.5 . . ? 
C17B C18B H18D 109.5 . . ? 
C17B C18B H18E 109.5 . . ? 
H18D C18B H18E 109.5 . . ? 
C17B C18B H18F 109.5 . . ? 
H18D C18B H18F 109.5 . . ? 
H18E C18B H18F 109.5 . . ? 
C17B C19B H19D 109.5 . . ? 
C17B C19B H19E 109.5 . . ? 
H19D C19B H19E 109.5 . . ? 
C17B C19B H19F 109.5 . . ? 
H19D C19B H19F 109.5 . . ? 
H19E C19B H19F 109.5 . . ? 
C21 C20 C22 109.0(3) . . ? 
C21 C20 P2 111.5(2) . . ? 
C22 C20 P2 113.0(3) . . ? 
C21 C20 H20 107.7 . . ? 
C22 C20 H20 107.7 . . ? 
P2 C20 H20 107.7 . . ? 
C20 C21 H21A 109.5 . . ? 
C20 C21 H21B 109.5 . . ? 
H21A C21 H21B 109.5 . . ? 
C20 C21 H21C 109.5 . . ? 
H21A C21 H21C 109.5 . . ? 
H21B C21 H21C 109.5 . . ? 
C20 C22 H22A 109.5 . . ? 
C20 C22 H22B 109.5 . . ? 
H22A C22 H22B 109.5 . . ? 
C20 C22 H22C 109.5 . . ? 
H22A C22 H22C 109.5 . . ? 
H22B C22 H22C 109.5 . . ? 
C24 C23 C25 108.9(3) . . ? 
C24 C23 P2 114.8(3) . . ? 
C25 C23 P2 114.7(3) . . ? 
C24 C23 H23 105.9 . . ? 
C25 C23 H23 105.9 . . ? 
P2 C23 H23 105.9 . . ? 
C23 C24 H24A 109.5 . . ? 
C23 C24 H24B 109.5 . . ? 
H24A C24 H24B 109.5 . . ? 
C23 C24 H24C 109.5 . . ? 
H24A C24 H24C 109.5 . . ? 
H24B C24 H24C 109.5 . . ? 
C23 C25 H25A 109.5 . . ? 
C23 C25 H25B 109.5 . . ? 
H25A C25 H25B 109.5 . . ? 
C23 C25 H25C 109.5 . . ? 
H25A C25 H25C 109.5 . . ? 
H25B C25 H25C 109.5 . . ? 
C28 C26 C27 110.0(3) . . ? 
C28 C26 P2 120.2(3) . . ? 
C27 C26 P2 110.7(2) . . ? 
C28 C26 H26 104.9 . . ? 
C27 C26 H26 104.9 . . ? 
P2 C26 H26 104.9 . . ? 
C26 C27 H27A 109.5 . . ? 
C26 C27 H27B 109.5 . . ? 
H27A C27 H27B 109.5 . . ? 
C26 C27 H27C 109.5 . . ? 
H27A C27 H27C 109.5 . . ? 
H27B C27 H27C 109.5 . . ? 
C26 C28 H28A 109.5 . . ? 
C26 C28 H28B 109.5 . . ? 
H28A C28 H28B 109.5 . . ? 
C26 C28 H28C 109.5 . . ? 
H28A C28 H28C 109.5 . . ? 
H28B C28 H28C 109.5 . . ? 
 
_diffrn_measured_fraction_theta_max    0.935 
_diffrn_reflns_theta_full              27.50 
_diffrn_measured_fraction_theta_full   1.000 
_refine_diff_density_max    1.950 
_refine_diff_density_min   -0.784 
_refine_diff_density_rms    0.116 

# start Validation Reply Form
_vrf_PLAT201_3-enriquen75
;
PROBLEM: Isotropic non-H Atoms in Main Residue(s) ....... 4 Report
RESPONSE: Two isopropyl groups were observed disordered, refined with
two moieties for 4 atoms, isotropic displacement parameters and 
complementary occupancy factors 
;
# end Validation Reply Form


#===END
# ---------------------------------------------------------------------
# Data for compound 6 
  
 
data_6-enriquen90b 
 
_audit_creation_method            SHELXL-97 
_chemical_name_systematic 
; 
 ? 
; 
_chemical_name_common             ? 
_chemical_melting_point           ? 
_chemical_formula_moiety          
 '4(C31 H54 Br Ir N2 P2), 2(CH40)' 
_chemical_formula_sum 
 'C31.50 H56 Br Ir N2 O0.50 P2' 
_chemical_formula_weight          804.83 
 
loop_ 
 _atom_type_symbol 
 _atom_type_description 
 _atom_type_scat_dispersion_real 
 _atom_type_scat_dispersion_imag 
 _atom_type_scat_source 
 'C'  'C'   0.0033   0.0016 
 'International Tables Vol C Tables 4.2.6.8 and 6.1.1.4' 
 'H'  'H'   0.0000   0.0000 
 'International Tables Vol C Tables 4.2.6.8 and 6.1.1.4' 
 'N'  'N'   0.0061   0.0033 
 'International Tables Vol C Tables 4.2.6.8 and 6.1.1.4' 
 'P'  'P'   0.1023   0.0942 
 'International Tables Vol C Tables 4.2.6.8 and 6.1.1.4' 
 'Ir'  'Ir'  -1.4442   7.9887 
 'International Tables Vol C Tables 4.2.6.8 and 6.1.1.4' 
 'Br'  'Br'  -0.2901   2.4595 
 'International Tables Vol C Tables 4.2.6.8 and 6.1.1.4' 
 'O'  'O'   0.0106   0.0060 
 'International Tables Vol C Tables 4.2.6.8 and 6.1.1.4' 
 
_symmetry_cell_setting            'monoclinic' 
_symmetry_space_group_name_H-M    'P21/c'
 
loop_ 
 _symmetry_equiv_pos_as_xyz 
 'x, y, z' 
 '-x, y+1/2, -z+1/2' 
 '-x, -y, -z' 
 'x, -y-1/2, z-1/2' 
 
_cell_length_a                    13.222(4) 
_cell_length_b                    15.518(5) 
_cell_length_c                    17.539(5) 
_cell_angle_alpha                 90.00 
_cell_angle_beta                  99.522(5) 
_cell_angle_gamma                 90.00 
_cell_volume                      3549.0(19) 
_cell_formula_units_Z             4 
_cell_measurement_temperature     173(2) 
_cell_measurement_reflns_used     9976 
_cell_measurement_theta_min       2 
_cell_measurement_theta_max       28 
 
_exptl_crystal_description        'irregular block' 
_exptl_crystal_colour             'colourless'
_exptl_crystal_size_max           0.24 
_exptl_crystal_size_mid           0.12 
_exptl_crystal_size_min           0.09 
_exptl_crystal_density_meas       ? 
_exptl_crystal_density_diffrn     1.506 
_exptl_crystal_density_method     'not measured' 
_exptl_crystal_F_000              1620 
_exptl_absorpt_coefficient_mu     5.001 
_exptl_absorpt_correction_type    'multi-scan' 
_exptl_absorpt_correction_T_min   0.563 
_exptl_absorpt_correction_T_max   0.862 
_exptl_absorpt_process_details    
;
Absorption correction performed with SADABS program. This is based on the
method of Blessing: Blessing, R. H., Acta Crystallogr., Sect. A 1995, 51, 33.

SADABS: Area-Detector Absorption Correction. Bruker-AXS 
within SAINT+ package, v. 6.1 (2000).
;
 
_diffrn_ambient_temperature       173(2) 
_diffrn_radiation_wavelength      0.71073 
_diffrn_radiation_type            MoK\a 
_diffrn_radiation_source          'fine-focus sealed tube' 
_diffrn_radiation_monochromator   graphite 
_diffrn_measurement_device_type   'Bruker APEX DUO system' 
_diffrn_measurement_method        '\w rotations with narrow frames' 
_diffrn_detector_area_resol_mean  8.33 
_diffrn_standards_decay_%         0 
_diffrn_reflns_number             40542 
_diffrn_reflns_av_R_equivalents   0.0484 
_diffrn_reflns_av_sigmaI/netI     0.0435 
_diffrn_reflns_limit_h_min        -17 
_diffrn_reflns_limit_h_max        16 
_diffrn_reflns_limit_k_min        -20 
_diffrn_reflns_limit_k_max        21 
_diffrn_reflns_limit_l_min        -24 
_diffrn_reflns_limit_l_max        24 
_diffrn_reflns_theta_min          1.76 
_diffrn_reflns_theta_max          29.66 
_reflns_number_total              9344 
_reflns_number_gt                 7447 
_reflns_threshold_expression      >2sigma(I) 
 
_computing_data_collection        'apex2 v. 7.0 (Bruker AXS, 2009)' 
_computing_cell_refinement        'SAINT+ v. 7.56a (Bruker AXS, 2008)' 
_computing_data_reduction         'SAINT+ v. 7.56a (Bruker AXS, 2008)' 
_computing_structure_solution     'SHELXS-97 (Sheldrick, 1990)' 
_computing_structure_refinement   'SHELXL-97 (Sheldrick, 1997)' 
_computing_molecular_graphics     'XP, SHELXTL v. 6.14 (Bruker, 2000)' 
_computing_publication_material   'XCIF, SHELXTL v. 6.14 (Bruker, 2000)'
 
_refine_special_details 
; 
 Refinement of F^2^ against ALL reflections.  The weighted R-factor wR and 
 goodness of fit S are based on F^2^, conventional R-factors R are based 
 on F, with F set to zero for negative F^2^. The threshold expression of 
 F^2^ > 2sigma(F^2^) is used only for calculating R-factors(gt) etc. and is 
 not relevant to the choice of reflections for refinement.  R-factors based 
 on F^2^ are statistically about twice as large as those based on F, and R- 
 factors based on ALL data will be even larger. 
; 
 
_refine_ls_structure_factor_coef  Fsqd  
_refine_ls_matrix_type            full 
_refine_ls_weighting_scheme       calc  
_refine_ls_weighting_details 
 'calc w=1/[\s^2^(Fo^2^)+(0.0422P)^2^+0.4724P] where P=(Fo^2^+2Fc^2^)/3' 
_atom_sites_solution_primary      direct 
_atom_sites_solution_secondary    difmap 
_atom_sites_solution_hydrogens    geom 
_refine_ls_hydrogen_treatment     mixed 
_refine_ls_extinction_method      none 
_refine_ls_extinction_coef        ? 
_refine_ls_number_reflns          9344 
_refine_ls_number_parameters      365 
_refine_ls_number_restraints      4 
_refine_ls_R_factor_all           0.0472 
_refine_ls_R_factor_gt            0.0317 
_refine_ls_wR_factor_ref          0.0805 
_refine_ls_wR_factor_gt           0.0746 
_refine_ls_goodness_of_fit_ref    1.015 
_refine_ls_restrained_S_all       1.015 
_refine_ls_shift/su_max           0.017 
_refine_ls_shift/su_mean          0.001 
 
loop_ 
 _atom_site_label 
 _atom_site_type_symbol 
 _atom_site_fract_x 
 _atom_site_fract_y 
 _atom_site_fract_z 
 _atom_site_U_iso_or_equiv 
 _atom_site_adp_type 
 _atom_site_occupancy 
 _atom_site_symmetry_multiplicity 
 _atom_site_calc_flag 
 _atom_site_refinement_flags 
 _atom_site_disorder_assembly 
 _atom_site_disorder_group 
Ir Ir 0.259875(10) 0.095977(8) 0.840593(7) 0.02466(5) Uani 1 1 d D . . 
H01 H 0.219(3) 0.127(2) 0.9153(13) 0.030 Uiso 1 1 d D . . 
H02 H 0.3680(15) 0.084(2) 0.8939(18) 0.030 Uiso 1 1 d D . . 
Br1 Br 0.33187(3) 0.03484(3) 0.71850(2) 0.04011(10) Uani 1 1 d . . . 
P1 P 0.22978(7) -0.03756(6) 0.89058(5) 0.02669(19) Uani 1 1 d . . . 
P2 P 0.31351(7) 0.23533(6) 0.82307(5) 0.0290(2) Uani 1 1 d . . . 
N1 N 0.1079(2) 0.11045(18) 0.76798(18) 0.0283(6) Uani 1 1 d . . . 
N2 N -0.0180(2) 0.10112(19) 0.66595(19) 0.0328(7) Uani 1 1 d . . . 
C1 C 0.0835(3) 0.0936(2) 0.6941(2) 0.0314(8) Uani 1 1 d . . . 
H1 H 0.1327 0.0775 0.6629 0.038 Uiso 1 1 calc R . . 
C2 C 0.0153(3) 0.1324(2) 0.7918(2) 0.0276(7) Uani 1 1 d . . . 
C3 C -0.0042(3) 0.1581(2) 0.8633(2) 0.0349(8) Uani 1 1 d . . . 
H3 H 0.0494 0.1623 0.9065 0.042 Uiso 1 1 calc R . . 
C4 C -0.1044(3) 0.1774(3) 0.8699(2) 0.0414(10) Uani 1 1 d . . . 
H4 H -0.1199 0.1960 0.9183 0.050 Uiso 1 1 calc R . . 
C5 C -0.1832(3) 0.1702(3) 0.8066(3) 0.0456(10) Uani 1 1 d . . . 
H5 H -0.2512 0.1838 0.8132 0.055 Uiso 1 1 calc R . . 
C6 C -0.1662(3) 0.1442(3) 0.7358(3) 0.0417(10) Uani 1 1 d . . . 
H6 H -0.2204 0.1388 0.6932 0.050 Uiso 1 1 calc R . . 
C7 C -0.0646(3) 0.1261(2) 0.7292(2) 0.0317(8) Uani 1 1 d . . . 
C8 C -0.0646(3) 0.0937(2) 0.5870(2) 0.0334(8) Uani 1 1 d . . . 
C9 C -0.0141(3) 0.1251(3) 0.5305(2) 0.0398(9) Uani 1 1 d . . . 
H9 H 0.0517 0.1507 0.5437 0.048 Uiso 1 1 calc R . . 
C10 C -0.0606(4) 0.1187(3) 0.4537(3) 0.0475(11) Uani 1 1 d . . . 
H10 H -0.0259 0.1389 0.4139 0.057 Uiso 1 1 calc R . . 
C11 C -0.1563(4) 0.0833(3) 0.4351(3) 0.0499(11) Uani 1 1 d . . . 
H11 H -0.1885 0.0804 0.3825 0.060 Uiso 1 1 calc R . . 
C12 C -0.2058(3) 0.0521(3) 0.4920(3) 0.0500(11) Uani 1 1 d . . . 
H12 H -0.2723 0.0278 0.4786 0.060 Uiso 1 1 calc R . . 
C13 C -0.1603(3) 0.0556(3) 0.5687(2) 0.0419(10) Uani 1 1 d . . . 
H13 H -0.1938 0.0324 0.6080 0.050 Uiso 1 1 calc R . . 
C14 C 0.2294(3) -0.0371(2) 0.9956(2) 0.0351(8) Uani 1 1 d . . . 
H14 H 0.2154 -0.0974 1.0111 0.042 Uiso 1 1 calc R . . 
C15 C 0.3323(3) -0.0094(3) 1.0436(2) 0.0483(11) Uani 1 1 d . . . 
H15A H 0.3497 0.0486 1.0282 0.072 Uiso 1 1 calc R . . 
H15B H 0.3861 -0.0498 1.0347 0.072 Uiso 1 1 calc R . . 
H15C H 0.3265 -0.0095 1.0986 0.072 Uiso 1 1 calc R . . 
C16 C 0.1448(3) 0.0204(3) 1.0180(2) 0.0413(9) Uani 1 1 d . . . 
H16A H 0.1358 0.0076 1.0711 0.062 Uiso 1 1 calc R . . 
H16B H 0.0804 0.0094 0.9829 0.062 Uiso 1 1 calc R . . 
H16C H 0.1640 0.0810 1.0142 0.062 Uiso 1 1 calc R . . 
C17 C 0.3212(3) -0.1248(3) 0.8744(3) 0.0391(9) Uani 1 1 d . . . 
H17 H 0.3044 -0.1401 0.8183 0.047 Uiso 1 1 calc R . . 
C18 C 0.4330(3) -0.0951(3) 0.8881(3) 0.0528(12) Uani 1 1 d . . . 
H18A H 0.4557 -0.0851 0.9435 0.079 Uiso 1 1 calc R . . 
H18B H 0.4391 -0.0415 0.8597 0.079 Uiso 1 1 calc R . . 
H18C H 0.4760 -0.1396 0.8701 0.079 Uiso 1 1 calc R . . 
C19 C 0.3128(4) -0.2080(3) 0.9188(3) 0.0556(12) Uani 1 1 d . . . 
H19A H 0.3563 -0.2522 0.9010 0.083 Uiso 1 1 calc R . . 
H19B H 0.2414 -0.2277 0.9100 0.083 Uiso 1 1 calc R . . 
H19C H 0.3352 -0.1977 0.9742 0.083 Uiso 1 1 calc R . . 
C20 C 0.1007(3) -0.0819(2) 0.8517(2) 0.0302(8) Uani 1 1 d . . . 
H20 H 0.0528 -0.0317 0.8494 0.036 Uiso 1 1 calc R . . 
C21 C 0.0539(3) -0.1514(3) 0.8965(2) 0.0455(10) Uani 1 1 d . . . 
H21A H -0.0161 -0.1638 0.8707 0.068 Uiso 1 1 calc R . . 
H21B H 0.0523 -0.1312 0.9493 0.068 Uiso 1 1 calc R . . 
H21C H 0.0954 -0.2039 0.8985 0.068 Uiso 1 1 calc R . . 
C22 C 0.0954(4) -0.1111(3) 0.7679(2) 0.0438(10) Uani 1 1 d . . . 
H22A H 0.1275 -0.1680 0.7669 0.066 Uiso 1 1 calc R . . 
H22B H 0.1318 -0.0696 0.7402 0.066 Uiso 1 1 calc R . . 
H22C H 0.0235 -0.1146 0.7429 0.066 Uiso 1 1 calc R . . 
C23 C 0.3169(3) 0.3041(3) 0.9098(2) 0.0414(10) Uani 1 1 d . . . 
H23 H 0.3411 0.3626 0.8970 0.050 Uiso 1 1 calc R . . 
C24 C 0.3906(4) 0.2704(3) 0.9788(3) 0.0594(13) Uani 1 1 d . . . 
H24A H 0.3840 0.3048 1.0245 0.089 Uiso 1 1 calc R . . 
H24B H 0.4610 0.2745 0.9684 0.089 Uiso 1 1 calc R . . 
H24C H 0.3744 0.2100 0.9881 0.089 Uiso 1 1 calc R . . 
C25 C 0.2096(4) 0.3142(3) 0.9315(3) 0.0548(12) Uani 1 1 d . . . 
H25A H 0.1893 0.2601 0.9534 0.082 Uiso 1 1 calc R . . 
H25B H 0.1603 0.3287 0.8852 0.082 Uiso 1 1 calc R . . 
H25C H 0.2109 0.3605 0.9697 0.082 Uiso 1 1 calc R . . 
C26 C 0.4433(3) 0.2449(3) 0.7961(3) 0.0438(10) Uani 1 1 d . . . 
H26 H 0.4345 0.2304 0.7398 0.053 Uiso 1 1 calc R . . 
C27 C 0.5204(3) 0.1795(3) 0.8369(3) 0.0604(13) Uani 1 1 d . . . 
H27A H 0.5812 0.1784 0.8117 0.091 Uiso 1 1 calc R . . 
H27B H 0.4889 0.1222 0.8339 0.091 Uiso 1 1 calc R . . 
H27C H 0.5404 0.1960 0.8912 0.091 Uiso 1 1 calc R . . 
C28 C 0.4895(4) 0.3362(3) 0.8036(4) 0.0727(16) Uani 1 1 d . . . 
H28A H 0.5103 0.3504 0.8584 0.109 Uiso 1 1 calc R . . 
H28B H 0.4382 0.3779 0.7796 0.109 Uiso 1 1 calc R . . 
H28C H 0.5495 0.3385 0.7775 0.109 Uiso 1 1 calc R . . 
C29 C 0.2295(3) 0.2969(2) 0.7461(2) 0.0385(9) Uani 1 1 d . . . 
H29 H 0.1579 0.2791 0.7503 0.046 Uiso 1 1 calc R . . 
C30 C 0.2291(5) 0.3962(3) 0.7499(3) 0.0578(13) Uani 1 1 d . . . 
H30A H 0.2962 0.4182 0.7424 0.087 Uiso 1 1 calc R . . 
H30B H 0.2148 0.4147 0.8005 0.087 Uiso 1 1 calc R . . 
H30C H 0.1760 0.4188 0.7092 0.087 Uiso 1 1 calc R . . 
C31 C 0.2455(3) 0.2680(3) 0.6662(2) 0.0476(11) Uani 1 1 d . . . 
H31A H 0.1866 0.2858 0.6279 0.071 Uiso 1 1 calc R . . 
H31B H 0.2520 0.2051 0.6654 0.071 Uiso 1 1 calc R . . 
H31C H 0.3081 0.2943 0.6537 0.071 Uiso 1 1 calc R . . 
O1A O 0.5517(11) 0.3947(8) 0.1547(7) 0.051(3) Uiso 0.25 1 d PD A 1 
H1A H 0.5748 0.4215 0.1955 0.077 Uiso 0.25 1 calc PR A 1 
O1B O 0.5754(10) 0.4299(9) 0.1682(6) 0.048(3) Uiso 0.25 1 d PD A 2 
H1B H 0.5587 0.3797 0.1788 0.072 Uiso 0.25 1 calc PR A 2 
C32 C 0.5463(6) 0.4441(5) 0.0990(4) 0.0342(16) Uiso 0.50 1 d PD . . 
H32A H 0.5064 0.4952 0.1082 0.051 Uiso 0.25 1 calc PR A 1 
H32B H 0.5126 0.4147 0.0521 0.051 Uiso 0.25 1 calc PR A 1 
H32C H 0.6155 0.4617 0.0924 0.051 Uiso 0.25 1 calc PR A 1 
H32D H 0.4727 0.4567 0.0900 0.051 Uiso 0.25 1 calc PR A 2 
H32E H 0.5593 0.3933 0.0689 0.051 Uiso 0.25 1 calc PR A 2 
H32F H 0.5838 0.4936 0.0829 0.051 Uiso 0.25 1 calc PR A 2 
 
loop_ 
 _atom_site_aniso_label 
 _atom_site_aniso_U_11 
 _atom_site_aniso_U_22 
 _atom_site_aniso_U_33 
 _atom_site_aniso_U_23 
 _atom_site_aniso_U_13 
 _atom_site_aniso_U_12 
Ir 0.01910(7) 0.02728(7) 0.02722(8) -0.00006(5) 0.00274(5) -0.00124(5) 
Br1 0.0298(2) 0.0505(2) 0.0413(2) -0.00854(18) 0.00953(16) 0.00516(17) 
P1 0.0228(4) 0.0263(4) 0.0295(5) -0.0004(4) 0.0001(3) -0.0012(4) 
P2 0.0258(5) 0.0299(5) 0.0316(5) 0.0022(4) 0.0060(4) -0.0033(4) 
N1 0.0209(15) 0.0320(16) 0.0321(16) 0.0007(12) 0.0049(12) 0.0010(12) 
N2 0.0236(16) 0.0397(18) 0.0338(17) 0.0014(13) 0.0005(13) 0.0015(13) 
C1 0.0236(18) 0.0357(19) 0.0344(19) -0.0025(16) 0.0033(14) 0.0008(15) 
C2 0.0236(17) 0.0251(16) 0.0341(19) 0.0052(14) 0.0045(14) 0.0008(14) 
C3 0.030(2) 0.038(2) 0.037(2) 0.0049(17) 0.0079(16) 0.0004(16) 
C4 0.038(2) 0.048(2) 0.043(2) 0.0060(19) 0.0201(19) 0.0055(18) 
C5 0.024(2) 0.062(3) 0.054(3) 0.012(2) 0.0148(18) 0.0061(19) 
C6 0.0239(19) 0.051(2) 0.050(3) 0.013(2) 0.0046(17) -0.0008(18) 
C7 0.0280(19) 0.0301(17) 0.036(2) 0.0062(15) 0.0032(15) 0.0002(15) 
C8 0.034(2) 0.0320(18) 0.0309(19) 0.0019(15) -0.0031(16) 0.0036(16) 
C9 0.033(2) 0.044(2) 0.042(2) -0.0051(18) 0.0055(18) -0.0044(18) 
C10 0.055(3) 0.052(2) 0.036(2) 0.0006(19) 0.007(2) -0.002(2) 
C11 0.053(3) 0.060(3) 0.033(2) -0.009(2) -0.003(2) 0.000(2) 
C12 0.037(2) 0.058(3) 0.049(3) -0.003(2) -0.0105(19) -0.010(2) 
C13 0.039(2) 0.043(2) 0.041(2) 0.0058(18) -0.0032(18) -0.0082(19) 
C14 0.038(2) 0.0352(19) 0.0299(19) 0.0040(15) -0.0015(16) -0.0060(17) 
C15 0.048(3) 0.057(3) 0.035(2) -0.0022(19) -0.0084(19) -0.004(2) 
C16 0.040(2) 0.050(2) 0.034(2) -0.0023(18) 0.0069(17) -0.0054(19) 
C17 0.032(2) 0.036(2) 0.046(2) -0.0052(18) -0.0022(17) 0.0078(17) 
C18 0.031(2) 0.056(3) 0.071(3) 0.004(2) 0.006(2) 0.016(2) 
C19 0.048(3) 0.032(2) 0.083(4) 0.001(2) -0.002(2) 0.007(2) 
C20 0.0242(18) 0.0308(18) 0.0340(19) 0.0001(15) -0.0003(15) -0.0055(14) 
C21 0.042(2) 0.045(2) 0.047(2) 0.0047(19) 0.0016(19) -0.016(2) 
C22 0.044(3) 0.050(2) 0.035(2) -0.0076(18) -0.0017(18) -0.0109(19) 
C23 0.052(3) 0.033(2) 0.041(2) -0.0053(17) 0.0123(19) -0.0137(18) 
C24 0.071(3) 0.062(3) 0.041(2) -0.011(2) -0.002(2) -0.016(3) 
C25 0.072(3) 0.041(2) 0.057(3) -0.014(2) 0.030(3) -0.005(2) 
C26 0.032(2) 0.051(2) 0.051(3) 0.005(2) 0.0143(19) -0.0099(19) 
C27 0.026(2) 0.073(3) 0.082(4) 0.008(3) 0.009(2) -0.004(2) 
C28 0.049(3) 0.068(3) 0.105(5) 0.014(3) 0.026(3) -0.022(3) 
C29 0.039(2) 0.0332(19) 0.043(2) 0.0075(17) 0.0050(18) 0.0025(17) 
C30 0.075(4) 0.036(2) 0.058(3) 0.009(2) -0.001(3) 0.005(2) 
C31 0.051(3) 0.056(3) 0.035(2) 0.0092(19) 0.0053(19) 0.008(2) 
 
_geom_special_details 
; 
 All esds (except the esd in the dihedral angle between two l.s. planes) 
 are estimated using the full covariance matrix.  The cell esds are taken 
 into account individually in the estimation of esds in distances, angles 
 and torsion angles; correlations between esds in cell parameters are only 
 used when they are defined by crystal symmetry.  An approximate (isotropic) 
 treatment of cell esds is used for estimating esds involving l.s. planes. 
; 
 
loop_ 
 _geom_bond_atom_site_label_1 
 _geom_bond_atom_site_label_2 
 _geom_bond_distance 
 _geom_bond_site_symmetry_2 
 _geom_bond_publ_flag 
Ir N1 2.205(3) . ? 
Ir P1 2.3101(11) . ? 
Ir P2 2.3122(11) . ? 
Ir Br1 2.6582(7) . ? 
Ir H01 1.578(10) . ? 
Ir H02 1.584(10) . ? 
P1 C14 1.844(4) . ? 
P1 C20 1.861(4) . ? 
P1 C17 1.867(4) . ? 
P2 C23 1.852(4) . ? 
P2 C26 1.860(4) . ? 
P2 C29 1.864(4) . ? 
N1 C1 1.309(5) . ? 
N1 C2 1.399(4) . ? 
N2 C1 1.357(5) . ? 
N2 C7 1.409(5) . ? 
N2 C8 1.423(5) . ? 
C1 H1 0.9500 . ? 
C2 C3 1.381(5) . ? 
C2 C7 1.395(5) . ? 
C3 C4 1.382(5) . ? 
C3 H3 0.9500 . ? 
C4 C5 1.396(6) . ? 
C4 H4 0.9500 . ? 
C5 C6 1.359(6) . ? 
C5 H5 0.9500 . ? 
C6 C7 1.396(5) . ? 
C6 H6 0.9500 . ? 
C8 C9 1.374(6) . ? 
C8 C13 1.385(5) . ? 
C9 C10 1.389(6) . ? 
C9 H9 0.9500 . ? 
C10 C11 1.367(7) . ? 
C10 H10 0.9500 . ? 
C11 C12 1.370(7) . ? 
C11 H11 0.9500 . ? 
C12 C13 1.381(6) . ? 
C12 H12 0.9500 . ? 
C13 H13 0.9500 . ? 
C14 C16 1.532(5) . ? 
C14 C15 1.537(5) . ? 
C14 H14 1.0000 . ? 
C15 H15A 0.9800 . ? 
C15 H15B 0.9800 . ? 
C15 H15C 0.9800 . ? 
C16 H16A 0.9800 . ? 
C16 H16B 0.9800 . ? 
C16 H16C 0.9800 . ? 
C17 C19 1.523(6) . ? 
C17 C18 1.529(6) . ? 
C17 H17 1.0000 . ? 
C18 H18A 0.9800 . ? 
C18 H18B 0.9800 . ? 
C18 H18C 0.9800 . ? 
C19 H19A 0.9800 . ? 
C19 H19B 0.9800 . ? 
C19 H19C 0.9800 . ? 
C20 C21 1.525(5) . ? 
C20 C22 1.529(5) . ? 
C20 H20 1.0000 . ? 
C21 H21A 0.9800 . ? 
C21 H21B 0.9800 . ? 
C21 H21C 0.9800 . ? 
C22 H22A 0.9800 . ? 
C22 H22B 0.9800 . ? 
C22 H22C 0.9800 . ? 
C23 C24 1.515(6) . ? 
C23 C25 1.537(6) . ? 
C23 H23 1.0000 . ? 
C24 H24A 0.9800 . ? 
C24 H24B 0.9800 . ? 
C24 H24C 0.9800 . ? 
C25 H25A 0.9800 . ? 
C25 H25B 0.9800 . ? 
C25 H25C 0.9800 . ? 
C26 C27 1.530(6) . ? 
C26 C28 1.540(6) . ? 
C26 H26 1.0000 . ? 
C27 H27A 0.9800 . ? 
C27 H27B 0.9800 . ? 
C27 H27C 0.9800 . ? 
C28 H28A 0.9800 . ? 
C28 H28B 0.9800 . ? 
C28 H28C 0.9800 . ? 
C29 C31 1.521(6) . ? 
C29 C30 1.542(5) . ? 
C29 H29 1.0000 . ? 
C30 H30A 0.9800 . ? 
C30 H30B 0.9800 . ? 
C30 H30C 0.9800 . ? 
C31 H31A 0.9800 . ? 
C31 H31B 0.9800 . ? 
C31 H31C 0.9800 . ? 
O1A C32 1.234(11) . ? 
O1A H1A 0.8400 . ? 
O1B C32 1.232(11) . ? 
O1B H1B 0.8400 . ? 
C32 H32A 0.9800 . ? 
C32 H32B 0.9800 . ? 
C32 H32C 0.9800 . ? 
C32 H32D 0.9800 . ? 
C32 H32E 0.9800 . ? 
C32 H32F 0.9800 . ? 
 
loop_ 
 _geom_angle_atom_site_label_1 
 _geom_angle_atom_site_label_2 
 _geom_angle_atom_site_label_3 
 _geom_angle 
 _geom_angle_site_symmetry_1 
 _geom_angle_site_symmetry_3 
 _geom_angle_publ_flag 
N1 Ir P1 96.48(8) . . ? 
N1 Ir P2 95.63(8) . . ? 
P1 Ir P2 164.86(3) . . ? 
N1 Ir Br1 89.12(8) . . ? 
P1 Ir Br1 95.32(3) . . ? 
P2 Ir Br1 93.91(3) . . ? 
N1 Ir H01 92.3(13) . . ? 
P1 Ir H01 81.8(13) . . ? 
P2 Ir H01 88.7(13) . . ? 
Br1 Ir H01 176.9(13) . . ? 
N1 Ir H02 178.8(13) . . ? 
P1 Ir H02 82.5(12) . . ? 
P2 Ir H02 85.3(12) . . ? 
Br1 Ir H02 91.5(13) . . ? 
H01 Ir H02 87.0(19) . . ? 
C14 P1 C20 102.33(17) . . ? 
C14 P1 C17 105.29(19) . . ? 
C20 P1 C17 104.70(18) . . ? 
C14 P1 Ir 113.90(13) . . ? 
C20 P1 Ir 113.43(12) . . ? 
C17 P1 Ir 115.84(14) . . ? 
C23 P2 C26 105.4(2) . . ? 
C23 P2 C29 103.28(19) . . ? 
C26 P2 C29 103.84(19) . . ? 
C23 P2 Ir 113.31(13) . . ? 
C26 P2 Ir 115.14(14) . . ? 
C29 P2 Ir 114.64(13) . . ? 
C1 N1 C2 105.0(3) . . ? 
C1 N1 Ir 127.1(2) . . ? 
C2 N1 Ir 127.7(2) . . ? 
C1 N2 C7 105.8(3) . . ? 
C1 N2 C8 126.1(3) . . ? 
C7 N2 C8 127.8(3) . . ? 
N1 C1 N2 114.2(3) . . ? 
N1 C1 H1 122.9 . . ? 
N2 C1 H1 122.9 . . ? 
C3 C2 C7 120.3(3) . . ? 
C3 C2 N1 130.2(3) . . ? 
C7 C2 N1 109.5(3) . . ? 
C4 C3 C2 117.7(4) . . ? 
C4 C3 H3 121.2 . . ? 
C2 C3 H3 121.2 . . ? 
C3 C4 C5 121.0(4) . . ? 
C3 C4 H4 119.5 . . ? 
C5 C4 H4 119.5 . . ? 
C6 C5 C4 122.4(4) . . ? 
C6 C5 H5 118.8 . . ? 
C4 C5 H5 118.8 . . ? 
C5 C6 C7 116.3(4) . . ? 
C5 C6 H6 121.8 . . ? 
C7 C6 H6 121.8 . . ? 
C2 C7 C6 122.3(4) . . ? 
C2 C7 N2 105.4(3) . . ? 
C6 C7 N2 132.3(4) . . ? 
C9 C8 C13 121.2(4) . . ? 
C9 C8 N2 119.3(4) . . ? 
C13 C8 N2 119.5(4) . . ? 
C8 C9 C10 119.0(4) . . ? 
C8 C9 H9 120.5 . . ? 
C10 C9 H9 120.5 . . ? 
C11 C10 C9 120.3(4) . . ? 
C11 C10 H10 119.9 . . ? 
C9 C10 H10 119.9 . . ? 
C10 C11 C12 120.1(4) . . ? 
C10 C11 H11 119.9 . . ? 
C12 C11 H11 119.9 . . ? 
C11 C12 C13 120.8(4) . . ? 
C11 C12 H12 119.6 . . ? 
C13 C12 H12 119.6 . . ? 
C12 C13 C8 118.5(4) . . ? 
C12 C13 H13 120.8 . . ? 
C8 C13 H13 120.8 . . ? 
C16 C14 C15 108.3(3) . . ? 
C16 C14 P1 112.4(3) . . ? 
C15 C14 P1 113.6(3) . . ? 
C16 C14 H14 107.4 . . ? 
C15 C14 H14 107.4 . . ? 
P1 C14 H14 107.4 . . ? 
C14 C15 H15A 109.5 . . ? 
C14 C15 H15B 109.5 . . ? 
H15A C15 H15B 109.5 . . ? 
C14 C15 H15C 109.5 . . ? 
H15A C15 H15C 109.5 . . ? 
H15B C15 H15C 109.5 . . ? 
C14 C16 H16A 109.5 . . ? 
C14 C16 H16B 109.5 . . ? 
H16A C16 H16B 109.5 . . ? 
C14 C16 H16C 109.5 . . ? 
H16A C16 H16C 109.5 . . ? 
H16B C16 H16C 109.5 . . ? 
C19 C17 C18 109.0(3) . . ? 
C19 C17 P1 115.7(3) . . ? 
C18 C17 P1 113.0(3) . . ? 
C19 C17 H17 106.2 . . ? 
C18 C17 H17 106.2 . . ? 
P1 C17 H17 106.2 . . ? 
C17 C18 H18A 109.5 . . ? 
C17 C18 H18B 109.5 . . ? 
H18A C18 H18B 109.5 . . ? 
C17 C18 H18C 109.5 . . ? 
H18A C18 H18C 109.5 . . ? 
H18B C18 H18C 109.5 . . ? 
C17 C19 H19A 109.5 . . ? 
C17 C19 H19B 109.5 . . ? 
H19A C19 H19B 109.5 . . ? 
C17 C19 H19C 109.5 . . ? 
H19A C19 H19C 109.5 . . ? 
H19B C19 H19C 109.5 . . ? 
C21 C20 C22 109.1(3) . . ? 
C21 C20 P1 119.9(3) . . ? 
C22 C20 P1 110.8(3) . . ? 
C21 C20 H20 105.3 . . ? 
C22 C20 H20 105.3 . . ? 
P1 C20 H20 105.3 . . ? 
C20 C21 H21A 109.5 . . ? 
C20 C21 H21B 109.5 . . ? 
H21A C21 H21B 109.5 . . ? 
C20 C21 H21C 109.5 . . ? 
H21A C21 H21C 109.5 . . ? 
H21B C21 H21C 109.5 . . ? 
C20 C22 H22A 109.5 . . ? 
C20 C22 H22B 109.5 . . ? 
H22A C22 H22B 109.5 . . ? 
C20 C22 H22C 109.5 . . ? 
H22A C22 H22C 109.5 . . ? 
H22B C22 H22C 109.5 . . ? 
C24 C23 C25 109.6(4) . . ? 
C24 C23 P2 112.5(3) . . ? 
C25 C23 P2 111.4(3) . . ? 
C24 C23 H23 107.7 . . ? 
C25 C23 H23 107.7 . . ? 
P2 C23 H23 107.7 . . ? 
C23 C24 H24A 109.5 . . ? 
C23 C24 H24B 109.5 . . ? 
H24A C24 H24B 109.5 . . ? 
C23 C24 H24C 109.5 . . ? 
H24A C24 H24C 109.5 . . ? 
H24B C24 H24C 109.5 . . ? 
C23 C25 H25A 109.5 . . ? 
C23 C25 H25B 109.5 . . ? 
H25A C25 H25B 109.5 . . ? 
C23 C25 H25C 109.5 . . ? 
H25A C25 H25C 109.5 . . ? 
H25B C25 H25C 109.5 . . ? 
C27 C26 C28 110.3(4) . . ? 
C27 C26 P2 113.5(3) . . ? 
C28 C26 P2 114.9(3) . . ? 
C27 C26 H26 105.8 . . ? 
C28 C26 H26 105.8 . . ? 
P2 C26 H26 105.8 . . ? 
C26 C27 H27A 109.5 . . ? 
C26 C27 H27B 109.5 . . ? 
H27A C27 H27B 109.5 . . ? 
C26 C27 H27C 109.5 . . ? 
H27A C27 H27C 109.5 . . ? 
H27B C27 H27C 109.5 . . ? 
C26 C28 H28A 109.5 . . ? 
C26 C28 H28B 109.5 . . ? 
H28A C28 H28B 109.5 . . ? 
C26 C28 H28C 109.5 . . ? 
H28A C28 H28C 109.5 . . ? 
H28B C28 H28C 109.5 . . ? 
C31 C29 C30 109.7(4) . . ? 
C31 C29 P2 111.0(3) . . ? 
C30 C29 P2 119.2(3) . . ? 
C31 C29 H29 105.3 . . ? 
C30 C29 H29 105.3 . . ? 
P2 C29 H29 105.3 . . ? 
C29 C30 H30A 109.5 . . ? 
C29 C30 H30B 109.5 . . ? 
H30A C30 H30B 109.5 . . ? 
C29 C30 H30C 109.5 . . ? 
H30A C30 H30C 109.5 . . ? 
H30B C30 H30C 109.5 . . ? 
C29 C31 H31A 109.5 . . ? 
C29 C31 H31B 109.5 . . ? 
H31A C31 H31B 109.5 . . ? 
C29 C31 H31C 109.5 . . ? 
H31A C31 H31C 109.5 . . ? 
H31B C31 H31C 109.5 . . ? 
C32 O1A H1A 109.5 . . ? 
C32 O1B H1B 109.5 . . ? 
O1B C32 O1A 30.8(8) . . ? 
O1B C32 H32A 94.0 . . ? 
O1A C32 H32A 109.5 . . ? 
O1B C32 H32B 140.2 . . ? 
O1A C32 H32B 109.5 . . ? 
H32A C32 H32B 109.5 . . ? 
O1B C32 H32C 91.2 . . ? 
O1A C32 H32C 109.5 . . ? 
H32A C32 H32C 109.5 . . ? 
H32B C32 H32C 109.5 . . ? 
O1B C32 H32D 109.5 . . ? 
O1A C32 H32D 100.2 . . ? 
H32A C32 H32D 46.9 . . ? 
H32B C32 H32D 70.0 . . ? 
H32C C32 H32D 148.0 . . ? 
O1B C32 H32E 109.5 . . ? 
O1A C32 H32E 86.2 . . ? 
H32A C32 H32E 152.5 . . ? 
H32B C32 H32E 43.1 . . ? 
H32C C32 H32E 84.8 . . ? 
H32D C32 H32E 109.5 . . ? 
O1B C32 H32F 109.5 . . ? 
O1A C32 H32F 138.4 . . ? 
H32A C32 H32F 74.1 . . ? 
H32B C32 H32F 107.7 . . ? 
H32C C32 H32F 38.9 . . ? 
H32D C32 H32F 109.5 . . ? 
H32E C32 H32F 109.5 . . ? 
 
_diffrn_measured_fraction_theta_max    0.930 
_diffrn_reflns_theta_full              27.50 
_diffrn_measured_fraction_theta_full   0.999 
_refine_diff_density_max    1.324 
_refine_diff_density_min   -0.701 
_refine_diff_density_rms    0.122 

#===END
# ---------------------------------------------------------------------
# Data for compound 7 
   
 
data_7-enriquen89 
 
_audit_creation_method            SHELXL-97 
_chemical_name_systematic 
; 
 ? 
; 
_chemical_name_common             ? 
_chemical_melting_point           ? 
_chemical_formula_moiety          ? 
_chemical_formula_sum 
 'C32 H55 Ir N2 P2' 
_chemical_formula_weight          721.92 
 
loop_ 
 _atom_type_symbol 
 _atom_type_description 
 _atom_type_scat_dispersion_real 
 _atom_type_scat_dispersion_imag 
 _atom_type_scat_source 
 'C'  'C'   0.0033   0.0016 
 'International Tables Vol C Tables 4.2.6.8 and 6.1.1.4' 
 'H'  'H'   0.0000   0.0000 
 'International Tables Vol C Tables 4.2.6.8 and 6.1.1.4' 
 'N'  'N'   0.0061   0.0033 
 'International Tables Vol C Tables 4.2.6.8 and 6.1.1.4' 
 'P'  'P'   0.1023   0.0942 
 'International Tables Vol C Tables 4.2.6.8 and 6.1.1.4' 
 'Ir'  'Ir'  -1.4442   7.9887 
 'International Tables Vol C Tables 4.2.6.8 and 6.1.1.4' 
 
_symmetry_cell_setting            'triclinic' 
_symmetry_space_group_name_H-M    'P-1'
 
loop_ 
 _symmetry_equiv_pos_as_xyz 
 'x, y, z' 
 '-x, -y, -z' 
 
_cell_length_a                    9.2313(11) 
_cell_length_b                    10.1833(12) 
_cell_length_c                    18.029(2) 
_cell_angle_alpha                 99.495(2) 
_cell_angle_beta                  93.844(2) 
_cell_angle_gamma                 100.595(2) 
_cell_volume                      1634.8(3) 
_cell_formula_units_Z             2 
_cell_measurement_temperature     173(2) 
_cell_measurement_reflns_used     8044 
_cell_measurement_theta_min       2 
_cell_measurement_theta_max       28 
 
_exptl_crystal_description        'irregular block' 
_exptl_crystal_colour             'colourless'
_exptl_crystal_size_max           0.19 
_exptl_crystal_size_mid           0.14 
_exptl_crystal_size_min           0.08 
_exptl_crystal_density_meas       ? 
_exptl_crystal_density_diffrn     1.467 
_exptl_crystal_density_method     'not measured' 
_exptl_crystal_F_000              736 
_exptl_absorpt_coefficient_mu     4.204 
_exptl_absorpt_correction_type    'multi-scan' 
_exptl_absorpt_correction_T_min   0.679 
_exptl_absorpt_correction_T_max   0.862 
_exptl_absorpt_process_details    
;
Absorption correction performed with SADABS program. This is based on the
method of Blessing: Blessing, R. H., Acta Crystallogr., Sect. A 1995, 51, 33.

SADABS: Area-Detector Absorption Correction. Bruker-AXS 
within SAINT+ package, v. 6.1 (2000).
;
 
_diffrn_ambient_temperature       173(2) 
_diffrn_radiation_wavelength      0.71073 
_diffrn_radiation_type            MoK\a 
_diffrn_radiation_source          'fine-focus sealed tube' 
_diffrn_radiation_monochromator   graphite 
_diffrn_measurement_device_type   'Bruker APEX DUO system' 
_diffrn_measurement_method        '\w rotations with narrow frames' 
_diffrn_detector_area_resol_mean  8.33 
_diffrn_standards_decay_%         0 
_diffrn_reflns_number             17856 
_diffrn_reflns_av_R_equivalents   0.0261 
_diffrn_reflns_av_sigmaI/netI     0.0381 
_diffrn_reflns_limit_h_min        -12 
_diffrn_reflns_limit_h_max        12 
_diffrn_reflns_limit_k_min        -13 
_diffrn_reflns_limit_k_max        13 
_diffrn_reflns_limit_l_min        -23 
_diffrn_reflns_limit_l_max        23 
_diffrn_reflns_theta_min          2.07 
_diffrn_reflns_theta_max          29.47 
_reflns_number_total              8219 
_reflns_number_gt                 7220 
_reflns_threshold_expression      >2sigma(I) 
 
_computing_data_collection        'apex2 v. 7.0 (Bruker AXS, 2009)' 
_computing_cell_refinement        'SAINT+ v. 7.56a (Bruker AXS, 2008)' 
_computing_data_reduction         'SAINT+ v. 7.56a (Bruker AXS, 2008)' 
_computing_structure_solution     'SHELXS-97 (Sheldrick, 1990)' 
_computing_structure_refinement   'SHELXL-97 (Sheldrick, 1997)' 
_computing_molecular_graphics     'XP, SHELXTL v. 6.14 (Bruker, 2000)' 
_computing_publication_material   'XCIF, SHELXTL v. 6.14 (Bruker, 2000)'
 
_refine_special_details 
; 
 Refinement of F^2^ against ALL reflections.  The weighted R-factor wR and 
 goodness of fit S are based on F^2^, conventional R-factors R are based 
 on F, with F set to zero for negative F^2^. The threshold expression of 
 F^2^ > 2sigma(F^2^) is used only for calculating R-factors(gt) etc. and is 
 not relevant to the choice of reflections for refinement.  R-factors based 
 on F^2^ are statistically about twice as large as those based on F, and R- 
 factors based on ALL data will be even larger. 
; 
 
_refine_ls_structure_factor_coef  Fsqd  
_refine_ls_matrix_type            full 
_refine_ls_weighting_scheme       calc  
_refine_ls_weighting_details 
 'calc w=1/[\s^2^(Fo^2^)+(0.0365P)^2^+0.0000P] where P=(Fo^2^+2Fc^2^)/3' 
_atom_sites_solution_primary      direct 
_atom_sites_solution_secondary    difmap 
_atom_sites_solution_hydrogens    geom 
_refine_ls_hydrogen_treatment     mixed 
_refine_ls_extinction_method      none 
_refine_ls_extinction_coef        ? 
_refine_ls_number_reflns          8219 
_refine_ls_number_parameters      353 
_refine_ls_number_restraints      2 
_refine_ls_R_factor_all           0.0360 
_refine_ls_R_factor_gt            0.0285 
_refine_ls_wR_factor_ref          0.0673 
_refine_ls_wR_factor_gt           0.0645 
_refine_ls_goodness_of_fit_ref    1.024 
_refine_ls_restrained_S_all       1.024 
_refine_ls_shift/su_max           0.007 
_refine_ls_shift/su_mean          0.000 
 
loop_ 
 _atom_site_label 
 _atom_site_type_symbol 
 _atom_site_fract_x 
 _atom_site_fract_y 
 _atom_site_fract_z 
 _atom_site_U_iso_or_equiv 
 _atom_site_adp_type 
 _atom_site_occupancy 
 _atom_site_symmetry_multiplicity 
 _atom_site_calc_flag 
 _atom_site_refinement_flags 
 _atom_site_disorder_assembly 
 _atom_site_disorder_group 
Ir Ir 0.805020(13) 0.466764(12) 0.213370(6) 0.02980(5) Uani 1 1 d D . . 
H01 H 0.686(3) 0.551(3) 0.1906(18) 0.036 Uiso 1 1 d D . . 
H02 H 0.909(3) 0.490(3) 0.1497(14) 0.036 Uiso 1 1 d D . . 
P1 P 0.93890(10) 0.67009(8) 0.28057(5) 0.03292(18) Uani 1 1 d . . . 
P2 P 0.70229(9) 0.30468(8) 0.10905(4) 0.03022(17) Uani 1 1 d . . . 
N1 N 0.5601(3) 0.4361(3) 0.32752(17) 0.0446(7) Uani 1 1 d . . . 
N2 N 0.7348(3) 0.3212(3) 0.33800(15) 0.0347(6) Uani 1 1 d . . . 
C1 C 0.6849(4) 0.4094(3) 0.29657(18) 0.0352(7) Uani 1 1 d . . . 
C2 C 0.4708(5) 0.5253(5) 0.3036(3) 0.0665(12) Uani 1 1 d . . . 
H2A H 0.4778 0.6044 0.3438 0.100 Uiso 1 1 calc R . . 
H2B H 0.3674 0.4772 0.2927 0.100 Uiso 1 1 calc R . . 
H2C H 0.5059 0.5555 0.2579 0.100 Uiso 1 1 calc R . . 
C3 C 0.8700(3) 0.2827(3) 0.31955(17) 0.0317(6) Uani 1 1 d . . . 
C4 C 0.9321(3) 0.3420(3) 0.25993(17) 0.0307(6) Uani 1 1 d . . . 
C5 C 1.0673(4) 0.3080(4) 0.24303(19) 0.0381(7) Uani 1 1 d . . . 
H5 H 1.1141 0.3426 0.2030 0.046 Uiso 1 1 calc R . . 
C6 C 1.1368(4) 0.2260(4) 0.2820(2) 0.0455(9) Uani 1 1 d . . . 
H6 H 1.2291 0.2061 0.2683 0.055 Uiso 1 1 calc R . . 
C7 C 1.0734(4) 0.1736(4) 0.3401(2) 0.0455(9) Uani 1 1 d . . . 
H7 H 1.1218 0.1184 0.3670 0.055 Uiso 1 1 calc R . . 
C8 C 0.9379(4) 0.2016(3) 0.3595(2) 0.0399(8) Uani 1 1 d . . . 
H8 H 0.8923 0.1658 0.3995 0.048 Uiso 1 1 calc R . . 
C9 C 0.6395(4) 0.2899(4) 0.3927(2) 0.0458(9) Uani 1 1 d . . . 
C10 C 0.6355(5) 0.2051(5) 0.4456(2) 0.0626(12) Uani 1 1 d . . . 
H10 H 0.7089 0.1518 0.4503 0.075 Uiso 1 1 calc R . . 
C11 C 0.5194(6) 0.2009(7) 0.4920(3) 0.0817(17) Uani 1 1 d . . . 
H11 H 0.5137 0.1439 0.5289 0.098 Uiso 1 1 calc R . . 
C12 C 0.4129(6) 0.2788(7) 0.4845(3) 0.0822(17) Uani 1 1 d . . . 
H12 H 0.3361 0.2744 0.5171 0.099 Uiso 1 1 calc R . . 
C13 C 0.4140(5) 0.3625(6) 0.4318(3) 0.0675(13) Uani 1 1 d . . . 
H13 H 0.3402 0.4153 0.4269 0.081 Uiso 1 1 calc R . . 
C14 C 0.5301(4) 0.3649(4) 0.3860(2) 0.0483(9) Uani 1 1 d . . . 
C15 C 0.9175(4) 0.6977(3) 0.38417(18) 0.0408(8) Uani 1 1 d . . . 
H15 H 0.8101 0.6624 0.3875 0.049 Uiso 1 1 calc R . . 
C16 C 0.9486(5) 0.8424(4) 0.4298(2) 0.0541(10) Uani 1 1 d . . . 
H16A H 0.9210 0.8401 0.4812 0.081 Uiso 1 1 calc R . . 
H16B H 0.8904 0.8978 0.4055 0.081 Uiso 1 1 calc R . . 
H16C H 1.0543 0.8818 0.4320 0.081 Uiso 1 1 calc R . . 
C17 C 0.9985(6) 0.6098(4) 0.4256(2) 0.0568(11) Uani 1 1 d . . . 
H17A H 1.1044 0.6504 0.4342 0.085 Uiso 1 1 calc R . . 
H17B H 0.9845 0.5186 0.3950 0.085 Uiso 1 1 calc R . . 
H17C H 0.9588 0.6037 0.4742 0.085 Uiso 1 1 calc R . . 
C18 C 1.1441(4) 0.6931(4) 0.2778(2) 0.0456(9) Uani 1 1 d . . . 
H18 H 1.1750 0.6251 0.3064 0.055 Uiso 1 1 calc R . . 
C19 C 1.1941(5) 0.6587(5) 0.1995(3) 0.0643(12) Uani 1 1 d . . . 
H19A H 1.1746 0.7266 0.1695 0.096 Uiso 1 1 calc R . . 
H19B H 1.1395 0.5687 0.1745 0.096 Uiso 1 1 calc R . . 
H19C H 1.3005 0.6586 0.2040 0.096 Uiso 1 1 calc R . . 
C20 C 1.2349(5) 0.8307(5) 0.3181(3) 0.0761(15) Uani 1 1 d . . . 
H20A H 1.3407 0.8303 0.3161 0.114 Uiso 1 1 calc R . . 
H20B H 1.2133 0.8470 0.3709 0.114 Uiso 1 1 calc R . . 
H20C H 1.2089 0.9027 0.2930 0.114 Uiso 1 1 calc R . . 
C21 C 0.8878(5) 0.8251(4) 0.2539(2) 0.0473(9) Uani 1 1 d . . . 
H21 H 0.9532 0.9045 0.2878 0.057 Uiso 1 1 calc R . . 
C22 C 0.7278(5) 0.8339(4) 0.2684(3) 0.0660(12) Uani 1 1 d . . . 
H22A H 0.7127 0.9262 0.2668 0.099 Uiso 1 1 calc R . . 
H22B H 0.7090 0.8118 0.3182 0.099 Uiso 1 1 calc R . . 
H22C H 0.6596 0.7693 0.2294 0.099 Uiso 1 1 calc R . . 
C23 C 0.9123(7) 0.8415(5) 0.1732(3) 0.0737(14) Uani 1 1 d . . . 
H23A H 0.8527 0.7636 0.1381 0.111 Uiso 1 1 calc R . . 
H23B H 1.0174 0.8465 0.1661 0.111 Uiso 1 1 calc R . . 
H23C H 0.8827 0.9252 0.1634 0.111 Uiso 1 1 calc R . . 
C24 C 0.8316(4) 0.1906(3) 0.0759(2) 0.0392(8) Uani 1 1 d . . . 
H24 H 0.8720 0.1630 0.1226 0.047 Uiso 1 1 calc R . . 
C25 C 0.7655(5) 0.0570(4) 0.0218(3) 0.0585(11) Uani 1 1 d . . . 
H25A H 0.7280 0.0767 -0.0265 0.088 Uiso 1 1 calc R . . 
H25B H 0.6841 0.0061 0.0441 0.088 Uiso 1 1 calc R . . 
H25C H 0.8423 0.0028 0.0133 0.088 Uiso 1 1 calc R . . 
C26 C 0.9667(4) 0.2652(4) 0.0446(2) 0.0522(10) Uani 1 1 d . . . 
H26A H 1.0445 0.2113 0.0432 0.078 Uiso 1 1 calc R . . 
H26B H 1.0037 0.3538 0.0771 0.078 Uiso 1 1 calc R . . 
H26C H 0.9385 0.2783 -0.0067 0.078 Uiso 1 1 calc R . . 
C27 C 0.5328(4) 0.1798(3) 0.11726(19) 0.0377(7) Uani 1 1 d . . . 
H27 H 0.5085 0.1152 0.0679 0.045 Uiso 1 1 calc R . . 
C28 C 0.3997(4) 0.2468(4) 0.1310(2) 0.0514(10) Uani 1 1 d . . . 
H28A H 0.3148 0.1784 0.1383 0.077 Uiso 1 1 calc R . . 
H28B H 0.3749 0.2871 0.0872 0.077 Uiso 1 1 calc R . . 
H28C H 0.4239 0.3179 0.1762 0.077 Uiso 1 1 calc R . . 
C29 C 0.5579(5) 0.0966(4) 0.1783(2) 0.0552(10) Uani 1 1 d . . . 
H29A H 0.5690 0.1548 0.2282 0.083 Uiso 1 1 calc R . . 
H29B H 0.6478 0.0598 0.1709 0.083 Uiso 1 1 calc R . . 
H29C H 0.4728 0.0217 0.1750 0.083 Uiso 1 1 calc R . . 
C30 C 0.6365(4) 0.3810(4) 0.02899(18) 0.0387(7) Uani 1 1 d . . . 
H30 H 0.5588 0.4302 0.0487 0.046 Uiso 1 1 calc R . . 
C31 C 0.5594(5) 0.2804(4) -0.0419(2) 0.0593(11) Uani 1 1 d . . . 
H31A H 0.5161 0.3299 -0.0770 0.089 Uiso 1 1 calc R . . 
H31B H 0.4811 0.2135 -0.0273 0.089 Uiso 1 1 calc R . . 
H31C H 0.6321 0.2337 -0.0665 0.089 Uiso 1 1 calc R . . 
C32 C 0.7531(5) 0.4888(4) 0.0055(2) 0.0507(10) Uani 1 1 d . . . 
H32A H 0.8252 0.4451 -0.0215 0.076 Uiso 1 1 calc R . . 
H32B H 0.8040 0.5519 0.0507 0.076 Uiso 1 1 calc R . . 
H32C H 0.7051 0.5389 -0.0276 0.076 Uiso 1 1 calc R . . 
 
loop_ 
 _atom_site_aniso_label 
 _atom_site_aniso_U_11 
 _atom_site_aniso_U_22 
 _atom_site_aniso_U_33 
 _atom_site_aniso_U_23 
 _atom_site_aniso_U_13 
 _atom_site_aniso_U_12 
Ir 0.03451(7) 0.02668(7) 0.02684(7) 0.00279(4) -0.00007(4) 0.00553(5) 
P1 0.0426(5) 0.0271(4) 0.0270(4) 0.0036(3) -0.0004(3) 0.0041(3) 
P2 0.0322(4) 0.0289(4) 0.0273(4) 0.0035(3) 0.0003(3) 0.0022(3) 
N1 0.0368(16) 0.0546(19) 0.0403(17) -0.0010(14) 0.0062(13) 0.0113(14) 
N2 0.0364(15) 0.0393(15) 0.0257(13) 0.0052(11) 0.0041(11) 0.0006(12) 
C1 0.0338(17) 0.0357(17) 0.0328(17) -0.0018(13) 0.0028(13) 0.0056(14) 
C2 0.053(3) 0.073(3) 0.072(3) -0.004(2) 0.006(2) 0.024(2) 
C3 0.0327(16) 0.0295(15) 0.0300(16) 0.0046(12) -0.0014(12) 0.0006(13) 
C4 0.0355(16) 0.0264(15) 0.0282(15) 0.0003(12) 0.0006(12) 0.0059(12) 
C5 0.0350(17) 0.0422(19) 0.0367(18) 0.0082(14) 0.0024(14) 0.0061(15) 
C6 0.042(2) 0.050(2) 0.046(2) 0.0048(17) 0.0007(16) 0.0175(17) 
C7 0.052(2) 0.0347(18) 0.050(2) 0.0091(16) -0.0084(17) 0.0111(16) 
C8 0.050(2) 0.0306(16) 0.0363(18) 0.0086(14) 0.0000(15) 0.0003(15) 
C9 0.043(2) 0.057(2) 0.0307(18) 0.0045(16) 0.0054(14) -0.0066(17) 
C10 0.054(3) 0.087(3) 0.044(2) 0.021(2) 0.0072(19) -0.004(2) 
C11 0.068(3) 0.121(5) 0.051(3) 0.033(3) 0.016(2) -0.015(3) 
C12 0.059(3) 0.130(5) 0.045(3) 0.008(3) 0.023(2) -0.014(3) 
C13 0.046(2) 0.095(4) 0.052(3) -0.006(2) 0.0168(19) 0.003(2) 
C14 0.0377(19) 0.063(2) 0.036(2) -0.0024(17) 0.0057(15) -0.0015(18) 
C15 0.056(2) 0.0330(17) 0.0266(16) -0.0024(13) 0.0007(14) -0.0006(15) 
C16 0.082(3) 0.037(2) 0.037(2) -0.0033(16) 0.0087(19) 0.0042(19) 
C17 0.097(3) 0.037(2) 0.0300(19) 0.0042(15) -0.0080(19) 0.004(2) 
C18 0.045(2) 0.042(2) 0.046(2) 0.0050(16) 0.0037(16) 0.0023(16) 
C19 0.053(3) 0.075(3) 0.060(3) 0.005(2) 0.019(2) 0.001(2) 
C20 0.053(3) 0.066(3) 0.089(4) -0.021(3) 0.006(2) -0.011(2) 
C21 0.068(3) 0.0290(17) 0.042(2) 0.0061(15) -0.0030(18) 0.0069(17) 
C22 0.074(3) 0.048(2) 0.079(3) 0.008(2) -0.008(2) 0.028(2) 
C23 0.118(4) 0.058(3) 0.054(3) 0.027(2) 0.010(3) 0.026(3) 
C24 0.0396(19) 0.0324(17) 0.0409(19) -0.0042(14) 0.0005(14) 0.0058(14) 
C25 0.056(3) 0.043(2) 0.066(3) -0.0165(19) -0.002(2) 0.0095(19) 
C26 0.043(2) 0.055(2) 0.055(2) -0.0017(19) 0.0123(18) 0.0088(18) 
C27 0.0412(19) 0.0361(17) 0.0301(17) 0.0034(13) -0.0003(13) -0.0032(14) 
C28 0.039(2) 0.059(2) 0.053(2) 0.0087(19) 0.0111(17) 0.0014(18) 
C29 0.062(3) 0.047(2) 0.050(2) 0.0189(18) -0.0041(19) -0.0103(19) 
C30 0.0428(19) 0.0419(19) 0.0296(17) 0.0088(14) 0.0005(14) 0.0024(15) 
C31 0.071(3) 0.060(3) 0.035(2) 0.0091(18) -0.0124(19) -0.012(2) 
C32 0.056(2) 0.049(2) 0.044(2) 0.0183(17) -0.0028(17) -0.0052(18) 
 
_geom_special_details 
; 
 All esds (except the esd in the dihedral angle between two l.s. planes) 
 are estimated using the full covariance matrix.  The cell esds are taken 
 into account individually in the estimation of esds in distances, angles 
 and torsion angles; correlations between esds in cell parameters are only 
 used when they are defined by crystal symmetry.  An approximate (isotropic) 
 treatment of cell esds is used for estimating esds involving l.s. planes. 
; 
 
loop_ 
 _geom_bond_atom_site_label_1 
 _geom_bond_atom_site_label_2 
 _geom_bond_distance 
 _geom_bond_site_symmetry_2 
 _geom_bond_publ_flag 
Ir C1 2.023(3) . ? 
Ir C4 2.112(3) . ? 
Ir P1 2.3050(9) . ? 
Ir P2 2.3070(8) . ? 
Ir H01 1.583(10) . ? 
Ir H02 1.567(10) . ? 
P1 C21 1.854(4) . ? 
P1 C18 1.870(4) . ? 
P1 C15 1.872(3) . ? 
P2 C27 1.857(3) . ? 
P2 C30 1.866(3) . ? 
P2 C24 1.873(3) . ? 
N1 C1 1.366(4) . ? 
N1 C14 1.389(5) . ? 
N1 C2 1.431(5) . ? 
N2 C1 1.380(4) . ? 
N2 C9 1.403(4) . ? 
N2 C3 1.419(4) . ? 
C2 H2A 0.9800 . ? 
C2 H2B 0.9800 . ? 
C2 H2C 0.9800 . ? 
C3 C8 1.385(5) . ? 
C3 C4 1.420(4) . ? 
C4 C5 1.395(4) . ? 
C5 C6 1.391(5) . ? 
C5 H5 0.9500 . ? 
C6 C7 1.370(5) . ? 
C6 H6 0.9500 . ? 
C7 C8 1.387(5) . ? 
C7 H7 0.9500 . ? 
C8 H8 0.9500 . ? 
C9 C14 1.384(6) . ? 
C9 C10 1.386(6) . ? 
C10 C11 1.401(6) . ? 
C10 H10 0.9500 . ? 
C11 C12 1.386(8) . ? 
C11 H11 0.9500 . ? 
C12 C13 1.377(7) . ? 
C12 H12 0.9500 . ? 
C13 C14 1.395(5) . ? 
C13 H13 0.9500 . ? 
C15 C17 1.520(5) . ? 
C15 C16 1.531(5) . ? 
C15 H15 1.0000 . ? 
C16 H16A 0.9800 . ? 
C16 H16B 0.9800 . ? 
C16 H16C 0.9800 . ? 
C17 H17A 0.9800 . ? 
C17 H17B 0.9800 . ? 
C17 H17C 0.9800 . ? 
C18 C19 1.521(5) . ? 
C18 C20 1.531(6) . ? 
C18 H18 1.0000 . ? 
C19 H19A 0.9800 . ? 
C19 H19B 0.9800 . ? 
C19 H19C 0.9800 . ? 
C20 H20A 0.9800 . ? 
C20 H20B 0.9800 . ? 
C20 H20C 0.9800 . ? 
C21 C23 1.519(6) . ? 
C21 C22 1.533(6) . ? 
C21 H21 1.0000 . ? 
C22 H22A 0.9800 . ? 
C22 H22B 0.9800 . ? 
C22 H22C 0.9800 . ? 
C23 H23A 0.9800 . ? 
C23 H23B 0.9800 . ? 
C23 H23C 0.9800 . ? 
C24 C26 1.529(5) . ? 
C24 C25 1.534(5) . ? 
C24 H24 1.0000 . ? 
C25 H25A 0.9800 . ? 
C25 H25B 0.9800 . ? 
C25 H25C 0.9800 . ? 
C26 H26A 0.9800 . ? 
C26 H26B 0.9800 . ? 
C26 H26C 0.9800 . ? 
C27 C29 1.525(5) . ? 
C27 C28 1.527(5) . ? 
C27 H27 1.0000 . ? 
C28 H28A 0.9800 . ? 
C28 H28B 0.9800 . ? 
C28 H28C 0.9800 . ? 
C29 H29A 0.9800 . ? 
C29 H29B 0.9800 . ? 
C29 H29C 0.9800 . ? 
C30 C32 1.524(5) . ? 
C30 C31 1.538(5) . ? 
C30 H30 1.0000 . ? 
C31 H31A 0.9800 . ? 
C31 H31B 0.9800 . ? 
C31 H31C 0.9800 . ? 
C32 H32A 0.9800 . ? 
C32 H32B 0.9800 . ? 
C32 H32C 0.9800 . ? 
 
loop_ 
 _geom_angle_atom_site_label_1 
 _geom_angle_atom_site_label_2 
 _geom_angle_atom_site_label_3 
 _geom_angle 
 _geom_angle_site_symmetry_1 
 _geom_angle_site_symmetry_3 
 _geom_angle_publ_flag 
C1 Ir C4 77.73(13) . . ? 
C1 Ir P1 97.85(9) . . ? 
C4 Ir P1 96.12(8) . . ? 
C1 Ir P2 103.14(9) . . ? 
C4 Ir P2 94.99(8) . . ? 
P1 Ir P2 157.91(3) . . ? 
C1 Ir H01 90.3(12) . . ? 
C4 Ir H01 168.1(12) . . ? 
P1 Ir H01 86.2(12) . . ? 
P2 Ir H01 86.9(12) . . ? 
C1 Ir H02 170.4(12) . . ? 
C4 Ir H02 93.3(12) . . ? 
P1 Ir H02 86.5(12) . . ? 
P2 Ir H02 73.9(12) . . ? 
H01 Ir H02 98.5(17) . . ? 
C21 P1 C18 105.67(18) . . ? 
C21 P1 C15 101.45(16) . . ? 
C18 P1 C15 103.22(17) . . ? 
C21 P1 Ir 115.66(13) . . ? 
C18 P1 Ir 114.85(12) . . ? 
C15 P1 Ir 114.36(11) . . ? 
C27 P2 C30 100.61(16) . . ? 
C27 P2 C24 101.70(16) . . ? 
C30 P2 C24 109.61(16) . . ? 
C27 P2 Ir 118.83(11) . . ? 
C30 P2 Ir 112.38(11) . . ? 
C24 P2 Ir 112.57(11) . . ? 
C1 N1 C14 111.1(3) . . ? 
C1 N1 C2 125.1(3) . . ? 
C14 N1 C2 123.9(3) . . ? 
C1 N2 C9 111.2(3) . . ? 
C1 N2 C3 116.2(3) . . ? 
C9 N2 C3 132.6(3) . . ? 
N1 C1 N2 104.8(3) . . ? 
N1 C1 Ir 137.3(3) . . ? 
N2 C1 Ir 117.9(2) . . ? 
N1 C2 H2A 109.5 . . ? 
N1 C2 H2B 109.5 . . ? 
H2A C2 H2B 109.5 . . ? 
N1 C2 H2C 109.5 . . ? 
H2A C2 H2C 109.5 . . ? 
H2B C2 H2C 109.5 . . ? 
C8 C3 N2 122.5(3) . . ? 
C8 C3 C4 123.8(3) . . ? 
N2 C3 C4 113.6(3) . . ? 
C5 C4 C3 113.9(3) . . ? 
C5 C4 Ir 131.5(2) . . ? 
C3 C4 Ir 114.6(2) . . ? 
C6 C5 C4 123.2(3) . . ? 
C6 C5 H5 118.4 . . ? 
C4 C5 H5 118.4 . . ? 
C7 C6 C5 120.5(3) . . ? 
C7 C6 H6 119.7 . . ? 
C5 C6 H6 119.7 . . ? 
C6 C7 C8 119.5(3) . . ? 
C6 C7 H7 120.3 . . ? 
C8 C7 H7 120.3 . . ? 
C3 C8 C7 119.0(3) . . ? 
C3 C8 H8 120.5 . . ? 
C7 C8 H8 120.5 . . ? 
C14 C9 C10 120.3(4) . . ? 
C14 C9 N2 105.5(3) . . ? 
C10 C9 N2 134.2(4) . . ? 
C9 C10 C11 117.6(5) . . ? 
C9 C10 H10 121.2 . . ? 
C11 C10 H10 121.2 . . ? 
C12 C11 C10 120.7(5) . . ? 
C12 C11 H11 119.7 . . ? 
C10 C11 H11 119.7 . . ? 
C13 C12 C11 122.6(4) . . ? 
C13 C12 H12 118.7 . . ? 
C11 C12 H12 118.7 . . ? 
C12 C13 C14 115.8(5) . . ? 
C12 C13 H13 122.1 . . ? 
C14 C13 H13 122.1 . . ? 
C9 C14 N1 107.5(3) . . ? 
C9 C14 C13 123.0(4) . . ? 
N1 C14 C13 129.6(4) . . ? 
C17 C15 C16 109.1(3) . . ? 
C17 C15 P1 112.3(3) . . ? 
C16 C15 P1 119.6(3) . . ? 
C17 C15 H15 104.8 . . ? 
C16 C15 H15 104.8 . . ? 
P1 C15 H15 104.8 . . ? 
C15 C16 H16A 109.5 . . ? 
C15 C16 H16B 109.5 . . ? 
H16A C16 H16B 109.5 . . ? 
C15 C16 H16C 109.5 . . ? 
H16A C16 H16C 109.5 . . ? 
H16B C16 H16C 109.5 . . ? 
C15 C17 H17A 109.5 . . ? 
C15 C17 H17B 109.5 . . ? 
H17A C17 H17B 109.5 . . ? 
C15 C17 H17C 109.5 . . ? 
H17A C17 H17C 109.5 . . ? 
H17B C17 H17C 109.5 . . ? 
C19 C18 C20 109.3(3) . . ? 
C19 C18 P1 114.9(3) . . ? 
C20 C18 P1 115.9(3) . . ? 
C19 C18 H18 105.2 . . ? 
C20 C18 H18 105.2 . . ? 
P1 C18 H18 105.2 . . ? 
C18 C19 H19A 109.5 . . ? 
C18 C19 H19B 109.5 . . ? 
H19A C19 H19B 109.5 . . ? 
C18 C19 H19C 109.5 . . ? 
H19A C19 H19C 109.5 . . ? 
H19B C19 H19C 109.5 . . ? 
C18 C20 H20A 109.5 . . ? 
C18 C20 H20B 109.5 . . ? 
H20A C20 H20B 109.5 . . ? 
C18 C20 H20C 109.5 . . ? 
H20A C20 H20C 109.5 . . ? 
H20B C20 H20C 109.5 . . ? 
C23 C21 C22 109.8(4) . . ? 
C23 C21 P1 114.3(3) . . ? 
C22 C21 P1 111.7(3) . . ? 
C23 C21 H21 106.9 . . ? 
C22 C21 H21 106.9 . . ? 
P1 C21 H21 106.9 . . ? 
C21 C22 H22A 109.5 . . ? 
C21 C22 H22B 109.5 . . ? 
H22A C22 H22B 109.5 . . ? 
C21 C22 H22C 109.5 . . ? 
H22A C22 H22C 109.5 . . ? 
H22B C22 H22C 109.5 . . ? 
C21 C23 H23A 109.5 . . ? 
C21 C23 H23B 109.5 . . ? 
H23A C23 H23B 109.5 . . ? 
C21 C23 H23C 109.5 . . ? 
H23A C23 H23C 109.5 . . ? 
H23B C23 H23C 109.5 . . ? 
C26 C24 C25 109.8(3) . . ? 
C26 C24 P2 112.7(3) . . ? 
C25 C24 P2 117.7(3) . . ? 
C26 C24 H24 105.2 . . ? 
C25 C24 H24 105.2 . . ? 
P2 C24 H24 105.2 . . ? 
C24 C25 H25A 109.5 . . ? 
C24 C25 H25B 109.5 . . ? 
H25A C25 H25B 109.5 . . ? 
C24 C25 H25C 109.5 . . ? 
H25A C25 H25C 109.5 . . ? 
H25B C25 H25C 109.5 . . ? 
C24 C26 H26A 109.5 . . ? 
C24 C26 H26B 109.5 . . ? 
H26A C26 H26B 109.5 . . ? 
C24 C26 H26C 109.5 . . ? 
H26A C26 H26C 109.5 . . ? 
H26B C26 H26C 109.5 . . ? 
C29 C27 C28 110.4(3) . . ? 
C29 C27 P2 111.8(2) . . ? 
C28 C27 P2 112.2(3) . . ? 
C29 C27 H27 107.3 . . ? 
C28 C27 H27 107.3 . . ? 
P2 C27 H27 107.3 . . ? 
C27 C28 H28A 109.5 . . ? 
C27 C28 H28B 109.5 . . ? 
H28A C28 H28B 109.5 . . ? 
C27 C28 H28C 109.5 . . ? 
H28A C28 H28C 109.5 . . ? 
H28B C28 H28C 109.5 . . ? 
C27 C29 H29A 109.5 . . ? 
C27 C29 H29B 109.5 . . ? 
H29A C29 H29B 109.5 . . ? 
C27 C29 H29C 109.5 . . ? 
H29A C29 H29C 109.5 . . ? 
H29B C29 H29C 109.5 . . ? 
C32 C30 C31 109.2(3) . . ? 
C32 C30 P2 114.5(2) . . ? 
C31 C30 P2 116.2(3) . . ? 
C32 C30 H30 105.2 . . ? 
C31 C30 H30 105.2 . . ? 
P2 C30 H30 105.2 . . ? 
C30 C31 H31A 109.5 . . ? 
C30 C31 H31B 109.5 . . ? 
H31A C31 H31B 109.5 . . ? 
C30 C31 H31C 109.5 . . ? 
H31A C31 H31C 109.5 . . ? 
H31B C31 H31C 109.5 . . ? 
C30 C32 H32A 109.5 . . ? 
C30 C32 H32B 109.5 . . ? 
H32A C32 H32B 109.5 . . ? 
C30 C32 H32C 109.5 . . ? 
H32A C32 H32C 109.5 . . ? 
H32B C32 H32C 109.5 . . ? 
 
_diffrn_measured_fraction_theta_max    0.903 
_diffrn_reflns_theta_full              27.50 
_diffrn_measured_fraction_theta_full   0.996 
_refine_diff_density_max    1.984 
_refine_diff_density_min   -0.844 
_refine_diff_density_rms    0.101 


#===END
